# Supplementary material for: Water Vapor Detection in Volcanic Plumes: Near-Infrared Cameras applications at Lascar, Chile, and Litli Hrútur, Iceland
Source: Copernicus journal article supplement (doi:10.5194/egusphere-2025-6430), 2026-01-29
Supplement: Supplementary file 1 [file Supplementary_Table_1.xlsx]

## Sheet: Felipe_FAER1
STOD	Date time	Temp at 2m [°C]	Wind speed at 4.5 m	Direction at 4.5m [degrees; FROM]	Pressure [hPa]	Pressure equivalent at sea level [hPa]	RH
7001	2023-07-14	5.7	13.7	0	981.4	981.2	86
7001	2023-07-14 00:10:00	5.8	13.2	0	981.3	981.1	85
7001	2023-07-14 00:20:00	5.7	15	1	980.7	980.5	85
7001	2023-07-14 00:30:00	5.7	17.3	2	980.4	980.2	84
7001	2023-07-14 00:40:00	5.5	16.2	1	981.1	980.9	85
7001	2023-07-14 00:50:00	5.5	14.4	1	980.7	980.5	87
7001	2023-07-14 01:00:00	5.5	14.3	0	980.6	980.4	88
7001	2023-07-14 01:10:00	5.6	16.2	0	979.6	979.4	87
7001	2023-07-14 01:20:00	5.6	18.3	0	979.1	978.9	87
7001	2023-07-14 01:30:00	5.7	19.8	0	978.6	978.4	84
7001	2023-07-14 01:40:00	5.6	18.7	2	979.5	979.3	85
7001	2023-07-14 01:50:00	5.7	18.5	1	978.9	978.7	86
7001	2023-07-14 02:00:00	5.6	17.1	1	980.3	980.1	86
7001	2023-07-14 02:10:00	5.7	14.9	4	981.1	980.9	87
7001	2023-07-14 02:20:00	5.7	14.3	4	980.9	980.7	87
7001	2023-07-14 02:30:00	5.7	14.7	3	980.9	980.7	87
7001	2023-07-14 02:40:00	5.7	17.3	3	979.6	979.4	87
7001	2023-07-14 02:50:00	5.8	19.8	2	978.7	978.5	86
7001	2023-07-14 03:00:00	5.9	19	1	980.4	980.2	87
7001	2023-07-14 03:10:00	5.8	14.3	4	981.6	981.4	87
7001	2023-07-14 03:20:00	5.8	12.4	3	981.5	981.3	87
7001	2023-07-14 03:30:00	5.7	13.6	4	981.1	980.9	89
7001	2023-07-14 03:40:00	5.6	12.4	9	981.5	981.3	90
7001	2023-07-14 03:50:00	5.5	11.9	10	981.2	981	90
7001	2023-07-14 04:00:00	5.7	13.4	10	980.3	980.1	90
7001	2023-07-14 04:10:00	5.7	15.8	7	980.3	980.1	89
7001	2023-07-14 04:20:00	5.8	14.2	7	980.7	980.5	91
7001	2023-07-14 04:30:00	5.9	14.3	7	980.8	980.6	90
7001	2023-07-14 04:40:00	6	14.2	5	980.9	980.7	90
7001	2023-07-14 04:50:00	6	13.1	8	981.4	981.2	89
7001	2023-07-14 05:00:00	6	12.6	11	981.2	981	89
7001	2023-07-14 05:10:00	6	13.1	8	981.2	981	89
7001	2023-07-14 05:20:00	6	15	9	980.5	980.3	88
7001	2023-07-14 05:30:00	6.1	16.5	7	980.2	980	87
7001	2023-07-14 05:40:00	6.2	16.7	9	980.2	980	88
7001	2023-07-14 05:50:00	6.2	15.8	7	980.7	980.5	88
7001	2023-07-14 06:00:00	6.2	15.1	11	981	980.8	87
7001	2023-07-14 06:10:00	6.1	14.6	9	980.8	980.6	88
7001	2023-07-14 06:20:00	6.1	16.4	7	980.1	979.9	86
7001	2023-07-14 06:30:00	6.1	17.5	7	979.7	979.5	86
7001	2023-07-14 06:40:00	6.2	18.1	6	979.6	979.4	86
7001	2023-07-14 06:50:00	6.2	18.1	6	979.6	979.4	87
7001	2023-07-14 07:00:00	6.2	19.3	7	979.2	979	87
7001	2023-07-14 07:10:00	6.1	18.5	5	979.3	979.1	87
7001	2023-07-14 07:20:00	6.1	17.9	5	979.6	979.4	87
7001	2023-07-14 07:30:00	6	17.1	7	980.2	980	89
7001	2023-07-14 07:40:00	6	16.2	6	980	979.8	90
7001	2023-07-14 07:50:00	6	17	4	980	979.8	90
7001	2023-07-14 08:00:00	6.3	16.9	4	979.9	979.7	88
7001	2023-07-14 08:10:00	6.4	18.1	2	979.8	979.6	87
7001	2023-07-14 08:20:00	6.3	16.2	6	981	980.8	87
7001	2023-07-14 08:30:00	6.4	15.7	6	980.7	980.5	87
7001	2023-07-14 08:40:00	6.4	17.1	9	980.3	980.1	85
7001	2023-07-14 08:50:00	6.4	16.1	10	980.9	980.7	86
7001	2023-07-14 09:00:00	6.4	15.1	12	980.8	980.6	85
7001	2023-07-14 09:10:00	6.3	16	11	980.4	980.2	85
7001	2023-07-14 09:20:00	6.8	15.4	10	980.8	980.6	85
7001	2023-07-14 09:30:00	6.5	15.4	9	980.6	980.4	84
7001	2023-07-14 09:40:00	6.7	15.7	8	980.6	980.4	84
7001	2023-07-14 09:50:00	6.6	16.9	9	980.7	980.5	83
7001	2023-07-14 10:00:00	6.7	15.4	7	980.5	980.3	83
7001	2023-07-14 10:10:00	6.6	15.8	9	980.9	980.7	83
7001	2023-07-14 10:20:00	6.7	14.9	11	980.8	980.6	83
7001	2023-07-14 10:30:00	6.9	12.9	11	981.4	981.2	83
7001	2023-07-14 10:40:00	7.1	13.8	12	981.2	981	82
7001	2023-07-14 10:50:00	7.3	13.8	13	981.5	981.3	81
7001	2023-07-14 11:00:00	7.6	15.2	12	981	980.8	80
7001	2023-07-14 11:10:00	7.7	15.6	6	980.6	980.4	79
7001	2023-07-14 11:20:00	8	14.7	11	981	980.8	80
7001	2023-07-14 11:30:00	8.3	15.1	10	980.6	980.4	77
7001	2023-07-14 11:40:00	8.6	15.4	10	980.3	980.1	76
7001	2023-07-14 11:50:00	8.4	16.6	7	979.9	979.7	77
7001	2023-07-14 12:00:00	7.8	16.5	10	980	979.8	77
7001	2023-07-14 12:10:00	8.1	16	13	980.7	980.5	77
7001	2023-07-14 12:20:00	8.4	14.2	16	981.2	981	75
7001	2023-07-14 12:30:00	8	13.5	16	981.3	981.1	78
7001	2023-07-14 12:40:00	8.8	14.3	20	980.6	980.4	76
7001	2023-07-14 12:50:00	8.5	14	12	981.1	980.9	76
7001	2023-07-14 13:00:00	9.1	13.7	13	981.5	981.3	75
7001	2023-07-14 13:10:00	8.8	13.9	10	980.9	980.7	74
7001	2023-07-14 13:20:00	8.8	15	8	980.7	980.5	75
7001	2023-07-14 13:30:00	8.5	15.5	6	980.1	979.9	73
7001	2023-07-14 13:40:00	7.9	16.8	8	980.2	980	77
7001	2023-07-14 13:50:00	8	17	6	980.4	980.2	77
7001	2023-07-14 14:00:00	8	16	10	980.4	980.2	77
7001	2023-07-14 14:10:00	8.1	14.9	11	981	980.8	77
7001	2023-07-14 14:20:00	8.2	15.2	10	980.7	980.5	76
7001	2023-07-14 14:30:00	7.9	16.4	11	980.5	980.3	77
7001	2023-07-14 14:40:00	7.9	15.1	12	980.8	980.6	79
7001	2023-07-14 14:50:00	7.8	14.5	10	980.8	980.6	79
7001	2023-07-14 15:00:00	7.5	14.4	12	980.6	980.4	79
7001	2023-07-14 15:10:00	7.9	14.3	12	980.4	980.2	79
7001	2023-07-14 15:20:00	7.9	14.6	11	980.5	980.3	79
7001	2023-07-14 15:30:00	7.7	15	13	980.6	980.4	82
7001	2023-07-14 15:40:00	7.6	15	15	980.3	980.1	81
7001	2023-07-14 15:50:00	7.3	15.5	16	979.8	979.6	82
7001	2023-07-14 16:00:00	7.6	17.4	11	979.1	978.9	82
7001	2023-07-14 16:10:00	7.8	19.1	8	979	978.8	82
7001	2023-07-14 16:20:00	7.7	19.1	8	978.6	978.4	80
7001	2023-07-14 16:30:00	7.3	18.6	9	978.8	978.6	82
7001	2023-07-14 16:40:00	7.4	18.9	10	978.4	978.2	83
7001	2023-07-14 16:50:00	7.3	20.8	8	978.1	977.9	83
7001	2023-07-14 17:00:00	7.1	20.1	11	978.5	978.3	83
7001	2023-07-14 17:10:00	7.2	18.6	11	979.3	979.1	84
7001	2023-07-14 17:20:00	7.3	17.6	14	979.3	979.1	84
7001	2023-07-14 17:30:00	7.4	17.2	13	979.3	979.1	83
7001	2023-07-14 17:40:00	7.1	16.8	16	979.5	979.3	84
7001	2023-07-14 17:50:00	7.2	15.1	18	980.3	980.1	83
7001	2023-07-14 18:00:00	7.2	14.8	17	979.7	979.5	82
7001	2023-07-14 18:10:00	8.1	16.5	16	979.8	979.6	79
7001	2023-07-14 18:20:00	8.2	16.4	15	980	979.8	79
7001	2023-07-14 18:30:00	8.2	15.6	14	980.1	979.9	79
7001	2023-07-14 18:40:00	8.2	16.5	14	979.7	979.5	77
7001	2023-07-14 18:50:00	8.5	17.4	10	979.7	979.5	77
7001	2023-07-14 19:00:00	8.3	17.6	11	979.7	979.5	77
7001	2023-07-14 19:10:00	8.1	17.6	12	979.7	979.5	77
7001	2023-07-14 19:20:00	8	17.7	15	979.9	979.7	77
7001	2023-07-14 19:30:00	7.9	17.4	12	980.2	980	79
7001	2023-07-14 19:40:00	7.3	17	13	979.8	979.6	80
7001	2023-07-14 19:50:00	7	16.4	16	980.3	980.1	81
7001	2023-07-14 20:00:00	6.8	16.1	20	980.1	979.9	82
7001	2023-07-14 20:10:00	6.8	16.4	20	980.7	980.5	83
7001	2023-07-14 20:20:00	6.5	15.8	21	980.2	980	83
7001	2023-07-14 20:30:00	6.5	16.4	21	980.1	979.9	83
7001	2023-07-14 20:40:00	6.5	15.4	20	980.2	980	83
7001	2023-07-14 20:50:00	6.3	15.5	22	980.9	980.7	84
7001	2023-07-14 21:00:00	6.2	15	25	980.5	980.3	84
7001	2023-07-14 21:10:00	6.1	16	21	980.6	980.4	84
7001	2023-07-14 21:20:00	6.4	15	20	981	980.8	85
7001	2023-07-14 21:30:00	6.2	16	19	980.4	980.2	84
7001	2023-07-14 21:40:00	5.9	15	19	980.7	980.5	85
7001	2023-07-14 21:50:00	6	15.2	17	980.8	980.6	86
7001	2023-07-14 22:00:00	5.9	13.7	18	981	980.8	85
7001	2023-07-14 22:10:00	5.7	14.4	18	980.5	980.3	86
7001	2023-07-14 22:20:00	5.6	15.3	17	980.5	980.3	88
7001	2023-07-14 22:30:00	5.5	16.6	18	980.6	980.4	88
7001	2023-07-14 22:40:00	5.5	15.2	18	981	980.8	89
7001	2023-07-14 22:50:00	5.5	15	18	980.8	980.6	89
7001	2023-07-14 23:00:00	5.5	14.6	16	980.6	980.4	89
7001	2023-07-14 23:10:00	5.5	15.6	15	980.2	980	88
7001	2023-07-14 23:20:00	5.7	17.5	16	980.1	979.9	87
7001	2023-07-14 23:30:00	5.6	17.3	17	980.2	980	88
7001	2023-07-14 23:40:00	5.5	17.5	15	979.7	979.5	89
7001	2023-07-14 23:50:00	5.7	17.7	13	979.9	979.7	89
7001	2023-07-15	5.9	16.4	12	980.3	980.1	89
7001	2023-07-15 00:10:00	6	17.6	14	980	979.8	88
7001	2023-07-15 00:20:00	5.9	16.9	10	980.1	979.9	89
7001	2023-07-15 00:30:00	5.8	16.4	6	980.3	980.1	90
7001	2023-07-15 00:40:00	5.9	15.5	7	980.6	980.4	90
7001	2023-07-15 00:50:00	5.6	14.8	12	980.6	980.4	90
7001	2023-07-15 01:00:00	5.4	15.6	13	980.4	980.2	90
7001	2023-07-15 01:10:00	5.4	16.4	9	980.1	979.9	90
7001	2023-07-15 01:20:00	5.2	16.6	10	980.9	980.7	90
7001	2023-07-15 01:30:00	5.4	15	11	981	980.8	90
7001	2023-07-15 01:40:00	5.2	13.7	11	981.4	981.2	90
7001	2023-07-15 01:50:00	5	11.7	13	981.6	981.4	91
7001	2023-07-15 02:00:00	5.1	11.1	14	981.5	981.3	92
7001	2023-07-15 02:10:00	5.3	12	15	981.3	981.1	92
7001	2023-07-15 02:20:00	5.5	13.3	10	981.3	981.1	90
7001	2023-07-15 02:30:00	5.6	12.9	12	980.8	980.6	89
7001	2023-07-15 02:40:00	5.7	14.8	13	980.8	980.6	89
7001	2023-07-15 02:50:00	5.6	14.4	12	980.3	980.1	89
7001	2023-07-15 03:00:00	5.6	14.9	9	980.1	979.9	90
7001	2023-07-15 03:10:00	5.8	15.2	6	980.3	980.1	90
7001	2023-07-15 03:20:00	5.9	16.5	4	979.7	979.5	89
7001	2023-07-15 03:30:00	5.9	17.3	3	979.4	979.2	88
7001	2023-07-15 03:40:00	5.8	16.3	3	979.8	979.6	89
7001	2023-07-15 03:50:00	5.8	15.6	3	979.8	979.6	90
7001	2023-07-15 04:00:00	5.8	17.4	3	979.3	979.1	90
7001	2023-07-15 04:10:00	5.7	16.2	3	979.9	979.7	90
7001	2023-07-15 04:20:00	5.8	14.1	1	980.2	980	90
7001	2023-07-15 04:30:00	5.8	14.3	4	980	979.8	90
7001	2023-07-15 04:40:00	5.9	14.9	5	979.8	979.6	90
7001	2023-07-15 04:50:00	5.9	14.5	5	979.3	979.1	90
7001	2023-07-15 05:00:00	5.8	16.2	7	979.7	979.5	90
7001	2023-07-15 05:10:00	5.7	14.9	3	980.2	980	91
7001	2023-07-15 05:20:00	5.5	16.5	4	979	978.8	91
7001	2023-07-15 05:30:00	5.4	16.1	4	979.5	979.3	92
7001	2023-07-15 05:40:00	5.4	16	3	979.6	979.4	93
7001	2023-07-15 05:50:00	5.4	14.2	4	980	979.8	93
7001	2023-07-15 06:00:00	5.5	14.9	2	979.4	979.2	91
7001	2023-07-15 06:10:00	5.5	14.6	0	979.6	979.4	90
7001	2023-07-15 06:20:00	5.6	13.7	2	979.9	979.7	90
7001	2023-07-15 06:30:00	5.7	12.8	3	980.4	980.2	87
7001	2023-07-15 06:40:00	5.7	11.6	6	980.5	980.3	88
7001	2023-07-15 06:50:00	5.8	11.6	5	980.4	980.2	87
7001	2023-07-15 07:00:00	5.6	10.5	8	980.5	980.3	86
7001	2023-07-15 07:10:00	5.8	11.3	7	980	979.8	86
7001	2023-07-15 07:20:00	6.1	14.6	6	979	978.8	86
7001	2023-07-15 07:30:00	6.3	14.1	4	979.9	979.7	85
7001	2023-07-15 07:40:00	6	12.4	7	979.4	979.2	86
7001	2023-07-15 07:50:00	6.1	14.8	7	979.4	979.2	85
7001	2023-07-15 08:00:00	6.2	13.8	7	979.7	979.5	85
7001	2023-07-15 08:10:00	6.4	12.7	7	979.8	979.6	84
7001	2023-07-15 08:20:00	6.5	13.1	7	979.7	979.5	85
7001	2023-07-15 08:30:00	6.8	14	5	979	978.8	83
7001	2023-07-15 08:40:00	6.5	17.5	2	978.5	978.3	82
7001	2023-07-15 08:50:00	6.7	17.2	3	978.9	978.7	82
7001	2023-07-15 09:00:00	6.9	16.6	1	978.8	978.6	81
7001	2023-07-15 09:10:00	6.7	14.9	6	978.9	978.7	80
7001	2023-07-15 09:20:00	6.5	16.3	5	978.5	978.3	82
7001	2023-07-15 09:30:00	6.4	16.9	6	978.3	978.1	80
7001	2023-07-15 09:40:00	6.6	17.4	4	978.2	978	79
7001	2023-07-15 09:50:00	6.7	17.7	4	978.3	978.1	79
7001	2023-07-15 10:00:00	6.8	17.7	7	977.8	977.6	78
7001	2023-07-15 10:10:00	6.6	17.7	1	977.9	977.7	80
7001	2023-07-15 10:20:00	6.9	17.5	6	977.6	977.4	78
7001	2023-07-15 10:30:00	6.8	18.5	10	977.7	977.5	79
7001	2023-07-15 10:40:00	6.9	16.4	10	978.7	978.5	79
7001	2023-07-15 10:50:00	6.4	15.1	8	978.4	978.2	80
7001	2023-07-15 11:00:00	6.9	16.3	6	978.7	978.5	80
7001	2023-07-15 11:10:00	7	16.1	7	978.6	978.4	80
7001	2023-07-15 11:20:00	7.3	15.9	8	978.2	978	78
7001	2023-07-15 11:30:00	6.8	15.3	9	978.3	978.1	78
7001	2023-07-15 11:40:00	6.6	15.8	8	978.2	978	81
7001	2023-07-15 11:50:00	6.4	16.1	12	977.9	977.7	81
7001	2023-07-15 12:00:00	6.7	16	11	978.4	978.2	82
7001	2023-07-15 12:10:00	6.6	15.4	12	978.2	978	82
7001	2023-07-15 12:20:00	6.8	15.1	14	978.6	978.4	81
7001	2023-07-15 12:30:00	6.9	14.2	11	978.3	978.1	80
7001	2023-07-15 12:40:00	7	14.7	17	978.3	978.1	81
7001	2023-07-15 12:50:00	7.4	15.4	18	978.2	978	78
7001	2023-07-15 13:00:00	7.2	13.9	17	978.6	978.4	79
7001	2023-07-15 13:10:00	7.3	14.3	16	978.5	978.3	77
7001	2023-07-15 13:20:00	7.6	13.5	14	978.7	978.5	78
7001	2023-07-15 13:30:00	7.4	13.7	12	978.7	978.5	79
7001	2023-07-15 13:40:00	7.1	13.3	11	978.5	978.3	78
7001	2023-07-15 13:50:00	7.9	12.7	9	978.9	978.7	77
7001	2023-07-15 14:00:00	7.4	12.4	9	978.7	978.5	79
7001	2023-07-15 14:10:00	8.1	13	9	978.7	978.5	76
7001	2023-07-15 14:20:00	8.2	12.8	11	978.6	978.4	75
7001	2023-07-15 14:30:00	8.1	12.1	10	978.7	978.5	75
7001	2023-07-15 14:40:00	8.6	13	11	978.2	978	72
7001	2023-07-15 14:50:00	8.9	13	7	978.4	978.2	72
7001	2023-07-15 15:00:00	9.1	13.1	10	978.7	978.5	74
7001	2023-07-15 15:10:00	9.3	12.5	10	978.8	978.6	71
7001	2023-07-15 15:20:00	9.3	13	10	978.4	978.2	72
7001	2023-07-15 15:30:00	9	13.1	11	978.4	978.2	72
7001	2023-07-15 15:40:00	9.3	12.2	12	978.6	978.4	72
7001	2023-07-15 15:50:00	9.1	12.5	11	978.3	978.1	72
7001	2023-07-15 16:00:00	9.6	12.5	9	978.3	978.1	71
7001	2023-07-15 16:10:00	10	12.4	13	978.4	978.2	70
7001	2023-07-15 16:20:00	9.8	12.5	17	978.5	978.3	70
7001	2023-07-15 16:30:00	9.1	13.3	13	978.1	977.9	72
7001	2023-07-15 16:40:00	10	13.1	13	978.4	978.2	69
7001	2023-07-15 16:50:00	9.3	13.1	11	977.9	977.7	70
7001	2023-07-15 17:00:00	9.5	14.6	14	978	977.8	71
7001	2023-07-15 17:10:00	8.3	15.4	14	977.5	977.3	74
7001	2023-07-15 17:20:00	8.2	14.6	12	977.6	977.4	74
7001	2023-07-15 17:30:00	8.1	14.1	11	977.8	977.6	77
7001	2023-07-15 17:40:00	8.1	13.4	13	978	977.8	77
7001	2023-07-15 17:50:00	8.6	13.9	16	978	977.8	75
7001	2023-07-15 18:00:00	8.2	13.9	16	977.8	977.6	74
7001	2023-07-15 18:10:00	8.1	13.9	13	978.1	977.9	76
7001	2023-07-15 18:20:00	8.4	12.7	9	978	977.8	75
7001	2023-07-15 18:30:00	8.3	14.4	10	977.7	977.5	76
7001	2023-07-15 18:40:00	8	13	8	977.9	977.7	78
7001	2023-07-15 18:50:00	8.7	11.8	10	978.5	978.3	77
7001	2023-07-15 19:00:00	8.6	12.2	11	978.2	978	76
7001	2023-07-15 19:10:00	8.6	12.3	8	977.6	977.4	76
7001	2023-07-15 19:20:00	8.1	14.5	10	977.6	977.4	78
7001	2023-07-15 19:30:00	7.9	13.5	12	977.8	977.6	79
7001	2023-07-15 19:40:00	7.9	13.8	17	977.9	977.7	78
7001	2023-07-15 19:50:00	7.8	12.9	21	978.5	978.3	78
7001	2023-07-15 20:00:00	7.8	11.5	17	978.7	978.5	80
7001	2023-07-15 20:10:00	7.7	10.9	11	978.6	978.4	80
7001	2023-07-15 20:20:00	7.7	10.7	8	979	978.8	81
7001	2023-07-15 20:30:00	7.3	9.1	0	979.2	979	81
7001	2023-07-15 20:40:00	6.8	9.7	359	978.7	978.5	84
7001	2023-07-15 20:50:00	6.5	10	359	978.8	978.6	86
7001	2023-07-15 21:00:00	6.5	10.8	0	978.6	978.4	87
7001	2023-07-15 21:10:00	6.4	11.4	359	978.5	978.3	88
7001	2023-07-15 21:20:00	6.4	9.1	8	978.8	978.6	89
7001	2023-07-15 21:30:00	6.7	8.1	10	979	978.8	89
7001	2023-07-15 21:40:00	6.9	7.9	13	978.7	978.5	90
7001	2023-07-15 21:50:00	7.2	8.1	15	979	978.8	88
7001	2023-07-15 22:00:00	6.9	9.3	19	978.5	978.3	87
7001	2023-07-15 22:10:00	6.5	10	20	978.6	978.4	87
7001	2023-07-15 22:20:00	6.4	9.5	10	978.8	978.6	88
7001	2023-07-15 22:30:00	6.4	10.1	9	978.7	978.5	88
7001	2023-07-15 22:40:00	6.2	10.6	9	978.6	978.4	88
7001	2023-07-15 22:50:00	6	9.7	12	978.8	978.6	89
7001	2023-07-15 23:00:00	5.9	8.5	6	978.8	978.6	90
7001	2023-07-15 23:10:00	6.1	7	17	978.9	978.7	91
7001	2023-07-15 23:20:00	6.1	7.6	14	978.9	978.7	90
7001	2023-07-15 23:30:00	6	8.7	17	978.7	978.5	90
7001	2023-07-15 23:40:00	5.7	10.5	16	978.7	978.5	91
7001	2023-07-15 23:50:00	5.5	9.7	15	978.9	978.7	90
7001	2023-07-16	5.2	8.9	8	979	978.8	91
7001	2023-07-16 00:10:00	5.1	5.9	4	979.2	979	92
7001	2023-07-16 00:20:00	5.2	3.2	6	979.2	979	93
7001	2023-07-16 00:30:00	5.2	3.1	27	979.1	978.9	92
7001	2023-07-16 00:40:00	5.9	3.7	44	979.3	979.1	89
7001	2023-07-16 00:50:00	5.8	5.8	37	979.3	979.1	87
7001	2023-07-16 01:00:00	5.3	6.7	24	979.3	979.1	89
7001	2023-07-16 01:10:00	5.2	7	11	979.2	979	90
7001	2023-07-16 01:20:00	5.2	7.3	9	978.9	978.7	91
7001	2023-07-16 01:30:00	5.2	8.2	3	978.8	978.6	92
7001	2023-07-16 01:40:00	5.2	7	8	979	978.8	93
7001	2023-07-16 01:50:00	5.3	6.3	2	979.1	978.9	94
7001	2023-07-16 02:00:00	5.1	5.3	0	979	978.8	94
7001	2023-07-16 02:10:00	5.1	5.4	7	978.9	978.7	94
7001	2023-07-16 02:20:00	5.3	3.6	14	979	978.8	94
7001	2023-07-16 02:30:00	5.8	4.9	32	978.8	978.6	87
7001	2023-07-16 02:40:00	5.5	5.4	15	978.9	978.7	88
7001	2023-07-16 02:50:00	5	6.8	1	978.9	978.7	92
7001	2023-07-16 03:00:00	4.7	7.1	9	978.7	978.5	94
7001	2023-07-16 03:10:00	4.8	5.8	11	978.8	978.6	94
7001	2023-07-16 03:20:00	4.8	6	3	978.7	978.5	94
7001	2023-07-16 03:30:00	4.6	4.5	14	978.7	978.5	95
7001	2023-07-16 03:40:00	4.7	2.4	10	978.9	978.7	96
7001	2023-07-16 03:50:00	4.6	3.7	1	978.8	978.6	95
7001	2023-07-16 04:00:00	4.9	4.7	20	978.8	978.6	93
7001	2023-07-16 04:10:00	4.8	6.1	19	978.7	978.5	91
7001	2023-07-16 04:20:00	5.2	6.7	8	978.7	978.5	91
7001	2023-07-16 04:30:00	5.1	7.1	0	978.6	978.4	91
7001	2023-07-16 04:40:00	5.2	8.4	4	978.4	978.2	92
7001	2023-07-16 04:50:00	5.6	9.7	11	978.2	978	92
7001	2023-07-16 05:00:00	5.6	11.8	4	977.8	977.6	92
7001	2023-07-16 05:10:00	5.7	13	1	977.8	977.6	93
7001	2023-07-16 05:20:00	5.9	10.8	4	978.4	978.2	92
7001	2023-07-16 05:30:00	5.7	7	19	978.7	978.5	91
7001	2023-07-16 05:40:00	5.7	8.3	11	978.4	978.2	91
7001	2023-07-16 05:50:00	5.5	10.7	9	978.4	978.2	93
7001	2023-07-16 06:00:00	5.5	8.4	5	978.6	978.4	93
7001	2023-07-16 06:10:00	5.7	9.9	7	978.3	978.1	93
7001	2023-07-16 06:20:00	5.7	9.9	2	978.4	978.2	93
7001	2023-07-16 06:30:00	5.8	9	3	978.5	978.3	94
7001	2023-07-16 06:40:00	6.2	9	12	978.5	978.3	93
7001	2023-07-16 06:50:00	6.2	8	9	978.3	978.1	91
7001	2023-07-16 07:00:00	6.3	6.2	15	978.6	978.4	90
7001	2023-07-16 07:10:00	6.5	5	29	978.4	978.2	89
7001	2023-07-16 07:20:00	6.8	6.7	37	978.6	978.4	86
7001	2023-07-16 07:30:00	6.8	5.7	24	978.9	978.7	86
7001	2023-07-16 07:40:00	6.7	6.4	4	978.7	978.5	88
7001	2023-07-16 07:50:00	6.3	6.7	3	978.7	978.5	89
7001	2023-07-16 08:00:00	6.3	5.5	0	978.8	978.6	90
7001	2023-07-16 08:10:00	6.8	4	0	979.2	979	90
7001	2023-07-16 08:20:00	7.1	4	348	978.9	978.7	87
7001	2023-07-16 08:30:00	7.8	4.6	359	978.8	978.6	85
7001	2023-07-16 08:40:00	8.1	6.9	25	978.8	978.6	82
7001	2023-07-16 08:50:00	7.7	7.4	12	978.8	978.6	83
7001	2023-07-16 09:00:00	7.9	7.2	11	979.1	978.9	85
7001	2023-07-16 09:10:00	8.2	6.2	7	979	978.8	82
7001	2023-07-16 09:20:00	8.6	6.7	11	978.9	978.7	79
7001	2023-07-16 09:30:00	8.7	9.1	9	978.6	978.4	79
7001	2023-07-16 09:40:00	8.9	11	8	978.3	978.1	78
7001	2023-07-16 09:50:00	8.9	11.3	5	978	977.8	79
7001	2023-07-16 10:00:00	9.6	12.4	12	978.1	977.9	74
7001	2023-07-16 10:10:00	9.3	11.9	9	978.4	978.2	76
7001	2023-07-16 10:20:00	9.1	11.3	17	978.4	978.2	75
7001	2023-07-16 10:30:00	9	9.2	10	978.7	978.5	77
7001	2023-07-16 10:40:00	10.1	7.8	9	979	978.8	73
7001	2023-07-16 10:50:00	10.5	8.8	19	978.6	978.4	70
7001	2023-07-16 11:00:00	9.5	11.9	13	978	977.8	69
7001	2023-07-16 11:10:00	9.6	11.8	13	978.5	978.3	71
7001	2023-07-16 11:20:00	9.3	11	11	978.5	978.3	73
7001	2023-07-16 11:30:00	9.2	10.9	17	978.7	978.5	72
7001	2023-07-16 11:40:00	9.7	11.6	17	978.4	978.2	70
7001	2023-07-16 11:50:00	9.1	13.5	18	978.1	977.9	70
7001	2023-07-16 12:00:00	9.1	14.5	15	978.1	977.9	70
7001	2023-07-16 12:10:00	9.6	12.7	23	978.8	978.6	68
7001	2023-07-16 12:20:00	8.5	14.4	17	978.1	977.9	70
7001	2023-07-16 12:30:00	8.7	12.7	11	978.8	978.6	70
7001	2023-07-16 12:40:00	8.8	10.9	14	979.1	978.9	71
7001	2023-07-16 12:50:00	8.9	9.8	13	979	978.8	72
7001	2023-07-16 13:00:00	9.2	11	15	978.9	978.7	72
7001	2023-07-16 13:10:00	9.4	12.1	24	978.8	978.6	71
7001	2023-07-16 13:20:00	8.9	12.1	16	978.9	978.7	73
7001	2023-07-16 13:30:00	8.8	12.1	13	978.8	978.6	70
7001	2023-07-16 13:40:00	9.1	11.2	9	979.3	979.1	70
7001	2023-07-16 13:50:00	9.3	12.3	7	979	978.8	69
7001	2023-07-16 14:00:00	9.4	12.8	8	978.7	978.5	69
7001	2023-07-16 14:10:00	9	12.5	4	978.4	978.2	69
7001	2023-07-16 14:20:00	9.1	11.6	11	978.5	978.3	72
7001	2023-07-16 14:30:00	9.8	12.9	19	978.3	978.1	66
7001	2023-07-16 14:40:00	9.6	13.7	14	978.8	978.6	67
7001	2023-07-16 14:50:00	9.7	12.1	10	978.9	978.7	68
7001	2023-07-16 15:00:00	9.9	12.2	10	978.8	978.6	67
7001	2023-07-16 15:10:00	10	12.6	11	978.5	978.3	66
7001	2023-07-16 15:20:00	10.2	14.8	12	978.3	978.1	67
7001	2023-07-16 15:30:00	10.5	15.8	11	978.2	978	64
7001	2023-07-16 15:40:00	10.2	14.7	8	978.6	978.4	69
7001	2023-07-16 15:50:00	11	11.7	13	978.7	978.5	65
7001	2023-07-16 16:00:00	11.9	10.4	18	978.7	978.5	56
7001	2023-07-16 16:10:00	11.7	12.6	18	978.7	978.5	58
7001	2023-07-16 16:20:00	11.3	14.2	15	978.8	978.6	62
7001	2023-07-16 16:30:00	11.3	13.3	11	979.1	978.9	65
7001	2023-07-16 16:40:00	10.7	12.8	10	979	978.8	68
7001	2023-07-16 16:50:00	11.2	11.6	12	979.1	978.9	64
7001	2023-07-16 17:00:00	11.6	10.8	19	979.1	978.9	62
7001	2023-07-16 17:10:00	11.9	10.3	17	979.1	978.9	57
7001	2023-07-16 17:20:00	12	11.6	18	978.9	978.7	60
7001	2023-07-16 17:30:00	12.2	13.2	21	978.5	978.3	58
7001	2023-07-16 17:40:00	12.2	13.8	16	978.7	978.5	57
7001	2023-07-16 17:50:00	12.1	12.7	13	979.2	979	58
7001	2023-07-16 18:00:00	12.1	12.9	12	978.8	978.6	57
7001	2023-07-16 18:10:00	11.9	13.8	17	978.6	978.4	58
7001	2023-07-16 18:20:00	11.9	14.8	16	978.9	978.7	59
7001	2023-07-16 18:30:00	11.8	14	17	978.9	978.7	60
7001	2023-07-16 18:40:00	11.8	13.7	19	978.9	978.7	60
7001	2023-07-16 18:50:00	11.9	13.4	21	978.7	978.5	57
7001	2023-07-16 19:00:00	11.6	14.2	20	979	978.8	62
7001	2023-07-16 19:10:00	11.6	13.4	19	979.2	979	61
7001	2023-07-16 19:20:00	11.4	13.4	19	979.1	978.9	62
7001	2023-07-16 19:30:00	11.4	13.5	23	979.2	979	61
7001	2023-07-16 19:40:00	10.8	13.8	22	979.3	979.1	62
7001	2023-07-16 19:50:00	10.3	13.9	20	979	978.8	65
7001	2023-07-16 20:00:00	10	14	19	979.3	979.1	67
7001	2023-07-16 20:10:00	10.1	12.5	19	979.4	979.2	67
7001	2023-07-16 20:20:00	10.3	13.3	18	979.3	979.1	67
7001	2023-07-16 20:30:00	10.5	13.7	24	979.3	979.1	64
7001	2023-07-16 20:40:00	10.2	14.1	23	979.3	979.1	65
7001	2023-07-16 20:50:00	10.1	13.8	21	979.5	979.3	65
7001	2023-07-16 21:00:00	10	13.4	20	979.8	979.6	66
7001	2023-07-16 21:10:00	9.9	13.2	20	979.5	979.3	65
7001	2023-07-16 21:20:00	9.5	13	16	979.9	979.7	69
7001	2023-07-16 21:30:00	9.3	12.3	22	979.9	979.7	69
7001	2023-07-16 21:40:00	9.1	13	21	980	979.8	69
7001	2023-07-16 21:50:00	8.7	11.8	16	980	979.8	72
7001	2023-07-16 22:00:00	8.6	11.6	19	980.1	979.9	72
7001	2023-07-16 22:10:00	8.3	10.9	20	980.3	980.1	75
7001	2023-07-16 22:20:00	8.4	9.6	24	980.5	980.3	72
7001	2023-07-16 22:30:00	8.3	10.1	18	980.3	980.1	73
7001	2023-07-16 22:40:00	8.1	10.7	20	980.2	980	74
7001	2023-07-16 22:50:00	8	10.9	20	980.3	980.1	74
7001	2023-07-16 23:00:00	7.8	10.9	15	980.3	980.1	74
7001	2023-07-16 23:10:00	7.7	10.9	14	980.4	980.2	75
7001	2023-07-16 23:20:00	7.4	9.8	19	980.6	980.4	76
7001	2023-07-16 23:30:00	7.3	10.4	24	980.5	980.3	75
7001	2023-07-16 23:40:00	7.3	10.2	21	980.6	980.4	76
7001	2023-07-16 23:50:00	7.3	10.6	21	980.5	980.3	74
7001	2023-07-17	7.1	11.3	20	980.5	980.3	75
7001	2023-07-17 00:10:00	6.9	9.8	19	980.7	980.5	76
7001	2023-07-17 00:20:00	7	10.8	10	980.6	980.4	74
7001	2023-07-17 00:30:00	6.8	10.9	7	980.6	980.4	75
7001	2023-07-17 00:40:00	6.6	11.9	14	980.4	980.2	77
7001	2023-07-17 00:50:00	6.4	11.1	12	980.8	980.6	75
7001	2023-07-17 01:00:00	5.5	7.8	18	981.3	981.1	79
7001	2023-07-17 01:10:00	6.4	6.6	14	981.5	981.3	78
7001	2023-07-17 01:20:00	6.2	6.2	27	981.3	981.1	79
7001	2023-07-17 01:30:00	6	9.4	15	981.2	981	81
7001	2023-07-17 01:40:00	6.3	9	13	981.1	980.9	78
7001	2023-07-17 01:50:00	6.5	10	7	981	980.8	76
7001	2023-07-17 02:00:00	6.3	10.2	6	981.1	980.9	78
7001	2023-07-17 02:10:00	5.9	9.7	10	981.1	980.9	80
7001	2023-07-17 02:20:00	5.6	8.8	14	981.3	981.1	82
7001	2023-07-17 02:30:00	5.7	8.5	9	981.2	981	83
7001	2023-07-17 02:40:00	5.5	8.7	8	981.2	981	81
7001	2023-07-17 02:50:00	5	7.8	11	981.2	981	82
7001	2023-07-17 03:00:00	5.3	8.5	8	981	980.8	84
7001	2023-07-17 03:10:00	5.5	10.1	4	980.9	980.7	82
7001	2023-07-17 03:20:00	5.4	10.1	2	981	980.8	83
7001	2023-07-17 03:30:00	5.5	9.7	2	981.3	981.1	83
7001	2023-07-17 03:40:00	5.5	8	8	981.4	981.2	83
7001	2023-07-17 03:50:00	5.5	7.3	5	981.6	981.4	84
7001	2023-07-17 04:00:00	5.4	7	3	981.6	981.4	85
7001	2023-07-17 04:10:00	5.2	7.1	4	981.5	981.3	87
7001	2023-07-17 04:20:00	5.4	9.7	3	981.2	981	87
7001	2023-07-17 04:30:00	5.4	9.7	5	981.3	981.1	87
7001	2023-07-17 04:40:00	5	8.4	9	981.5	981.3	89
7001	2023-07-17 04:50:00	5.1	7.9	13	981.6	981.4	90
7001	2023-07-17 05:00:00	5.1	7.8	19	981.8	981.6	91
7001	2023-07-17 05:10:00	5.1	6.9	17	981.8	981.6	91
7001	2023-07-17 05:20:00	5.3	7.4	11	981.5	981.3	91
7001	2023-07-17 05:30:00	5.5	8.4	7	981.8	981.6	89
7001	2023-07-17 05:40:00	5.7	7.8	7	981.9	981.7	89
7001	2023-07-17 05:50:00	5.7	7.7	6	981.8	981.6	88
7001	2023-07-17 06:00:00	6	7.5	12	982.1	981.9	88
7001	2023-07-17 06:10:00	6.1	8	9	981.9	981.7	87
7001	2023-07-17 06:20:00	6.2	8.9	10	982	981.8	87
7001	2023-07-17 06:30:00	6.3	8.2	9	982.3	982.1	87
7001	2023-07-17 06:40:00	6.5	8.2	13	982.2	982	86
7001	2023-07-17 06:50:00	6.8	7.8	14	982.3	982.1	84
7001	2023-07-17 07:00:00	6.8	7.8	19	982.3	982.1	83
7001	2023-07-17 07:10:00	6.9	7.9	14	982.3	982.1	83
7001	2023-07-17 07:20:00	6.8	8.4	10	982.2	982	82
7001	2023-07-17 07:30:00	7.1	9.2	4	982.2	982	80
7001	2023-07-17 07:40:00	7.4	10	11	982.3	982.1	79
7001	2023-07-17 07:50:00	7.4	9.9	12	982.3	982.1	79
7001	2023-07-17 08:00:00	7.7	9.4	11	982.4	982.2	78
7001	2023-07-17 08:10:00	7.7	9.7	14	982.5	982.3	77
7001	2023-07-17 08:20:00	8	9.2	17	982.6	982.4	75
7001	2023-07-17 08:30:00	8	9	16	982.5	982.3	73
7001	2023-07-17 08:40:00	8.1	8.4	17	982.8	982.6	75
7001	2023-07-17 08:50:00	8.2	8.4	14	982.7	982.5	73
7001	2023-07-17 09:00:00	8.4	8.3	13	983	982.8	73
7001	2023-07-17 09:10:00	8.7	7.8	9	982.8	982.6	68
7001	2023-07-17 09:20:00	8.9	8.7	10	982.9	982.7	68
7001	2023-07-17 09:30:00	9	8.4	14	982.9	982.7	67
7001	2023-07-17 09:40:00	9.2	8.3	13	982.9	982.7	67
7001	2023-07-17 09:50:00	9.6	8.4	6	983	982.8	64
7001	2023-07-17 10:00:00	9.8	8.4	8	983	982.8	64
7001	2023-07-17 10:10:00	10	8.4	6	983.1	982.9	63
7001	2023-07-17 10:20:00	9.9	8.6	5	983.1	982.9	61
7001	2023-07-17 10:30:00	9.9	8.9	4	983.1	982.9	63
7001	2023-07-17 10:40:00	10.1	9.2	3	983.1	982.9	59
7001	2023-07-17 10:50:00	10.1	9.1	3	983.3	983.1	62
7001	2023-07-17 11:00:00	10.3	8.7	3	983.3	983.1	58
7001	2023-07-17 11:10:00	10.1	8.9	1	983.2	983	56
7001	2023-07-17 11:20:00	10.5	8.2	2	983.2	983	53
7001	2023-07-17 11:30:00	11.6	7.9	4	983.6	983.4	52
7001	2023-07-17 11:40:00	11.4	8.8	0	983.4	983.2	49
7001	2023-07-17 11:50:00	11.1	9	359	983.3	983.1	49
7001	2023-07-17 12:00:00	11.3	8.8	0	983.5	983.3	53
7001	2023-07-17 12:10:00	10.7	8.1	0	983.5	983.3	56
7001	2023-07-17 12:20:00	10.9	7.6	0	983.7	983.5	55
7001	2023-07-17 12:30:00	10.8	7.7	0	983.7	983.5	52
7001	2023-07-17 12:40:00	10.8	8.3	346	983.5	983.3	51
7001	2023-07-17 12:50:00	11.2	8.1	353	983.8	983.6	53
7001	2023-07-17 13:00:00	11.5	8.1	0	983.8	983.6	53
7001	2023-07-17 13:10:00	11.3	8.4	0	983.6	983.4	53
7001	2023-07-17 13:20:00	11.4	8.6	343	983.6	983.4	52
7001	2023-07-17 13:30:00	11.1	8.4	350	983.8	983.6	53
7001	2023-07-17 13:40:00	11.4	8.3	352	983.7	983.5	55
7001	2023-07-17 13:50:00	11.4	8.6	346	983.6	983.4	54
7001	2023-07-17 14:00:00	11.5	8.6	343	983.7	983.5	55
7001	2023-07-17 14:10:00	11.8	8.3	346	983.8	983.6	56
7001	2023-07-17 14:20:00	11.6	8.6	342	983.8	983.6	60
7001	2023-07-17 14:30:00	11.8	8.9	338	983.8	983.6	56
7001	2023-07-17 14:40:00	12	8.9	339	983.7	983.5	58
7001	2023-07-17 14:50:00	12	9.3	333	983.9	983.7	58
7001	2023-07-17 15:00:00	11.5	9.4	332	983.9	983.7	57
7001	2023-07-17 15:10:00	12.1	9	331	984.1	983.9	57
7001	2023-07-17 15:20:00	11.7	9.1	331	984.1	983.9	58
7001	2023-07-17 15:30:00	11.8	9.1	326	984.1	983.9	58
7001	2023-07-17 15:40:00	11.4	8.8	323	984.2	984	59
7001	2023-07-17 15:50:00	11.5	8.9	324	984.2	984	61
7001	2023-07-17 16:00:00	11.3	8.6	325	984.3	984.1	60
7001	2023-07-17 16:10:00	11.4	8.4	324	984.2	984	62
7001	2023-07-17 16:20:00	11.7	8.3	325	984.4	984.2	58
7001	2023-07-17 16:30:00	11.1	8.4	329	984.3	984.1	65
7001	2023-07-17 16:40:00	11	8.4	328	984.3	984.1	66
7001	2023-07-17 16:50:00	11.3	8.3	328	984.5	984.3	65
7001	2023-07-17 17:00:00	11.7	8.3	329	984.5	984.3	57
7001	2023-07-17 17:10:00	11.5	8.5	328	984.6	984.4	62
7001	2023-07-17 17:20:00	11.5	8.3	327	984.7	984.5	59
7001	2023-07-17 17:30:00	11.7	8.2	324	984.7	984.5	52
7001	2023-07-17 17:40:00	11.2	7.6	326	984.8	984.6	57
7001	2023-07-17 17:50:00	10.8	6.9	320	985	984.8	61
7001	2023-07-17 18:00:00	10.8	6.9	323	984.8	984.6	53
7001	2023-07-17 18:10:00	11	7.1	328	985.2	985	54
7001	2023-07-17 18:20:00	10.4	7.3	328	985.1	984.9	55
7001	2023-07-17 18:30:00	10.3	6.4	320	985.3	985.1	63
7001	2023-07-17 18:40:00	10	5.9	326	985.4	985.2	69
7001	2023-07-17 18:50:00	9.7	6	323	985.3	985.1	72
7001	2023-07-17 19:00:00	9.9	6.3	329	985.3	985.1	75
7001	2023-07-17 19:10:00	9.5	6.6	329	985.2	985	75
7001	2023-07-17 19:20:00	9.5	6.7	332	985.2	985	79
7001	2023-07-17 19:30:00	9.3	6.9	326	985.3	985.1	79
7001	2023-07-17 19:40:00	9.2	6.7	324	985.6	985.4	80
7001	2023-07-17 19:50:00	9.2	6.6	328	985.5	985.3	80
7001	2023-07-17 20:00:00	9.1	6.2	332	985.5	985.3	82
7001	2023-07-17 20:10:00	8.9	5.9	329	985.5	985.3	85
7001	2023-07-17 20:20:00	8.9	6.5	331	985.5	985.3	86
7001	2023-07-17 20:30:00	8.7	6.4	325	985.4	985.2	87
7001	2023-07-17 20:40:00	8.5	6.3	317	985.7	985.5	89
7001	2023-07-17 20:50:00	8.6	5.8	316	985.7	985.5	89
7001	2023-07-17 21:00:00	8.6	5.8	322	985.6	985.4	88
7001	2023-07-17 21:10:00	8.6	6	319	985.7	985.5	88
7001	2023-07-17 21:20:00	8.4	5.6	314	985.6	985.4	89
7001	2023-07-17 21:30:00	8.3	4.9	317	985.6	985.4	90
7001	2023-07-17 21:40:00	8.2	5.1	314	985.8	985.6	91
7001	2023-07-17 21:50:00	8	5.6	313	985.8	985.6	92
7001	2023-07-17 22:00:00	8.1	5.4	313	985.9	985.7	93
7001	2023-07-17 22:10:00	7.9	5.3	315	985.9	985.7	93
7001	2023-07-17 22:20:00	7.9	4.8	316	986	985.8	94
7001	2023-07-17 22:30:00	7.9	4.5	321	986	985.8	94
7001	2023-07-17 22:40:00	7.7	3.7	313	986	985.8	95
7001	2023-07-17 22:50:00	7.6	3.8	315	986	985.8	95
7001	2023-07-17 23:00:00	7.6	4.4	318	986	985.8	96
7001	2023-07-17 23:10:00	7.6	4.6	319	985.9	985.7	96
7001	2023-07-17 23:20:00	7.6	4.9	319	986	985.8	96
7001	2023-07-17 23:30:00	7.6	5.4	321	986	985.8	96
7001	2023-07-17 23:40:00	7.5	5.1	319	986.1	985.9	97
7001	2023-07-17 23:50:00	7.6	4.8	318	986.2	986	97
7001	2023-07-18	7.5	4.7	324	986.2	986	97
7001	2023-07-18 00:10:00	7.5	4.7	325	986.2	986	97
7001	2023-07-18 00:20:00	7.5	4.8	327	986.2	986	98
7001	2023-07-18 00:30:00	7.4	5	326	986.1	985.9	98
7001	2023-07-18 00:40:00	7.2	5.2	326	986.1	985.9	98
7001	2023-07-18 00:50:00	7.1	5.3	326	986	985.8	98
7001	2023-07-18 01:00:00	7.2	6.3	328	985.9	985.7	98
7001	2023-07-18 01:10:00	7.1	6.9	328	985.9	985.7	98
7001	2023-07-18 01:20:00	7.1	7	328	985.9	985.7	98
7001	2023-07-18 01:30:00	7.3	6.6	331	986	985.8	98
7001	2023-07-18 01:40:00	7.3	6.2	331	986	985.8	99
7001	2023-07-18 01:50:00	7.4	6.3	329	986	985.8	99
7001	2023-07-18 02:00:00	7.5	6.2	331	986.1	985.9	99
7001	2023-07-18 02:10:00	7.6	6.3	330	986.1	985.9	99
7001	2023-07-18 02:20:00	7.7	6.6	331	986.1	985.9	99
7001	2023-07-18 02:30:00	7.6	7	330	986	985.8	99
7001	2023-07-18 02:40:00	7.6	6.8	329	986	985.8	99
7001	2023-07-18 02:50:00	7.5	6.6	328	985.9	985.7	99
7001	2023-07-18 03:00:00	7.3	7	325	985.8	985.6	99
7001	2023-07-18 03:10:00	7.3	6.9	327	985.8	985.6	99
7001	2023-07-18 03:20:00	7.1	6.6	326	985.8	985.6	99
7001	2023-07-18 03:30:00	7	6.1	328	985.9	985.7	99
7001	2023-07-18 03:40:00	6.8	5.9	330	985.8	985.6	99
7001	2023-07-18 03:50:00	6.8	5.5	324	985.9	985.7	99
7001	2023-07-18 04:00:00	6.6	5.3	330	985.9	985.7	99
7001	2023-07-18 04:10:00	6.5	5.2	330	986	985.8	99
7001	2023-07-18 04:20:00	6.7	4.5	330	986	985.8	100
7001	2023-07-18 04:30:00	6.7	4.9	333	986	985.8	99
7001	2023-07-18 04:40:00	6.7	5.3	335	985.9	985.7	99
7001	2023-07-18 04:50:00	6.6	6.2	341	986	985.8	99
7001	2023-07-18 05:00:00	6.7	5.4	339	986.2	986	99
7001	2023-07-18 05:10:00	6.7	5.2	336	986.3	986.1	99
7001	2023-07-18 05:20:00	6.8	5.7	342	986.2	986	99
7001	2023-07-18 05:30:00	6.9	5.9	346	986.2	986	99
7001	2023-07-18 05:40:00	7	5.7	345	986.2	986	99
7001	2023-07-18 05:50:00	7	6.1	341	986.2	986	99
7001	2023-07-18 06:00:00	7	6.4	343	986.2	986	98
7001	2023-07-18 06:10:00	7.2	6	343	986.2	986	97
7001	2023-07-18 06:20:00	7.3	6	344	986.3	986.1	96
7001	2023-07-18 06:30:00	7.6	5.9	347	986.4	986.2	95
7001	2023-07-18 06:40:00	7.8	6.6	347	986.2	986	93
7001	2023-07-18 06:50:00	8.1	7.5	346	986.2	986	91
7001	2023-07-18 07:00:00	8.2	7.8	348	986.2	986	90
7001	2023-07-18 07:10:00	8.2	7.7	346	986.3	986.1	87
7001	2023-07-18 07:20:00	8.5	7.4	347	986.4	986.2	85
7001	2023-07-18 07:30:00	8.3	7.3	350	986.4	986.2	84
7001	2023-07-18 07:40:00	8.3	7.4	357	986.4	986.2	84
7001	2023-07-18 07:50:00	8.7	7	0	986.5	986.3	83
7001	2023-07-18 08:00:00	8.8	7.4	0	986.5	986.3	82
7001	2023-07-18 08:10:00	9.2	7.3	342	986.6	986.4	81
7001	2023-07-18 08:20:00	9.1	7.4	345	986.4	986.2	79
7001	2023-07-18 08:30:00	9.3	7.8	342	986.5	986.3	80
7001	2023-07-18 08:40:00	9.5	7.9	344	986.5	986.3	78
7001	2023-07-18 08:50:00	9.5	8.4	349	986.5	986.3	78
7001	2023-07-18 09:00:00	9.4	8.6	355	986.3	986.1	77
7001	2023-07-18 09:10:00	9.7	8.3	352	986.2	986	77
7001	2023-07-18 09:20:00	9.9	8.9	351	986.4	986.2	78
7001	2023-07-18 09:30:00	9.5	9.5	354	986.1	985.9	77
7001	2023-07-18 09:40:00	9.6	9.5	353	986.1	985.9	76
7001	2023-07-18 09:50:00	9.7	9.4	352	986.3	986.1	76
7001	2023-07-18 10:00:00	9.5	9.2	350	986.1	985.9	76
7001	2023-07-18 10:10:00	9.6	9.7	353	986.3	986.1	77
7001	2023-07-18 10:20:00	10.2	8.7	350	986.3	986.1	75
7001	2023-07-18 10:30:00	10.4	8.8	344	986.5	986.3	75
7001	2023-07-18 10:40:00	10.3	8.7	345	986.4	986.2	73
7001	2023-07-18 10:50:00	10.1	9.1	348	986.4	986.2	73
7001	2023-07-18 11:00:00	10.7	8.8	343	986.5	986.3	72
7001	2023-07-18 11:10:00	10.6	9.1	346	986.6	986.4	72
7001	2023-07-18 11:20:00	10.2	8.8	346	986.5	986.3	72
7001	2023-07-18 11:30:00	10.3	9.1	349	986.5	986.3	73
7001	2023-07-18 11:40:00	10.4	9.1	352	986.4	986.2	73
7001	2023-07-18 11:50:00	10.8	8.8	0	986.5	986.3	72
7001	2023-07-18 12:00:00	10.5	9.2	348	986.4	986.2	74
7001	2023-07-18 12:10:00	10.4	9.2	347	986.4	986.2	73
7001	2023-07-18 12:20:00	10.4	9.2	343	986.4	986.2	73
7001	2023-07-18 12:30:00	10.5	8.8	342	986.4	986.2	74
7001	2023-07-18 12:40:00	10.6	8.9	341	986.4	986.2	73
7001	2023-07-18 12:50:00	10.8	8.6	343	986.4	986.2	73
7001	2023-07-18 13:00:00	11.2	8.4	332	986.6	986.4	73
7001	2023-07-18 13:10:00	10.6	8.4	340	986.5	986.3	75
7001	2023-07-18 13:20:00	10.6	8.1	0	986.4	986.2	73
7001	2023-07-18 13:30:00	11.2	8.1	342	986.5	986.3	73
7001	2023-07-18 13:40:00	11.4	8.2	336	986.6	986.4	72
7001	2023-07-18 13:50:00	11.3	8.4	327	986.6	986.4	74
7001	2023-07-18 14:00:00	10.8	8.4	324	986.5	986.3	73
7001	2023-07-18 14:10:00	11.4	8.3	332	986.7	986.5	73
7001	2023-07-18 14:20:00	11.3	8.2	343	986.5	986.3	70
7001	2023-07-18 14:30:00	11.1	8.9	346	986.3	986.1	71
7001	2023-07-18 14:40:00	11.2	8.6	338	986.5	986.3	72
7001	2023-07-18 14:50:00	11.9	9	332	986.6	986.4	70
7001	2023-07-18 15:00:00	11.6	8.8	333	986.7	986.5	71
7001	2023-07-18 15:10:00	11.4	8.7	332	986.6	986.4	70
7001	2023-07-18 15:20:00	11.7	9.3	336	986.6	986.4	68
7001	2023-07-18 15:30:00	11.4	9.3	333	986.5	986.3	68
7001	2023-07-18 15:40:00	12.5	9.1	335	986.8	986.6	66
7001	2023-07-18 15:50:00	11.9	9.4	337	986.5	986.3	65
7001	2023-07-18 16:00:00	11.6	9.6	329	986.6	986.4	67
7001	2023-07-18 16:10:00	11.6	9.8	330	986.6	986.4	67
7001	2023-07-18 16:20:00	11.7	9.9	326	986.6	986.4	68
7001	2023-07-18 16:30:00	12.1	9.5	326	986.7	986.5	65
7001	2023-07-18 16:40:00	11.4	10.1	324	986.6	986.4	69
7001	2023-07-18 16:50:00	11.4	10	326	986.5	986.3	67
7001	2023-07-18 17:00:00	11.6	9.7	328	986.7	986.5	67
7001	2023-07-18 17:10:00	11.3	9.9	323	986.6	986.4	67
7001	2023-07-18 17:20:00	11.2	10	325	986.5	986.3	69
7001	2023-07-18 17:30:00	11.5	10.1	327	986.6	986.4	69
7001	2023-07-18 17:40:00	11.2	9.5	330	986.5	986.3	69
7001	2023-07-18 17:50:00	11	9.4	326	986.6	986.4	64
7001	2023-07-18 18:00:00	11.4	9.5	323	986.8	986.6	66
7001	2023-07-18 18:10:00	11	9.5	330	986.6	986.4	65
7001	2023-07-18 18:20:00	10.9	10.2	330	986.6	986.4	63
7001	2023-07-18 18:30:00	11.4	9.8	329	986.9	986.7	65
7001	2023-07-18 18:40:00	10.7	9.8	325	986.6	986.4	67
7001	2023-07-18 18:50:00	10.9	9.3	328	986.6	986.4	68
7001	2023-07-18 19:00:00	10.5	10	329	986.6	986.4	68
7001	2023-07-18 19:10:00	10.7	9.3	328	986.6	986.4	69
7001	2023-07-18 19:20:00	10.6	9.2	328	986.7	986.5	71
7001	2023-07-18 19:30:00	10.6	8.8	332	986.7	986.5	71
7001	2023-07-18 19:40:00	10.4	8.8	334	986.8	986.6	71
7001	2023-07-18 19:50:00	10.2	8.6	330	986.7	986.5	73
7001	2023-07-18 20:00:00	10.3	8.7	332	986.8	986.6	72
7001	2023-07-18 20:10:00	9.9	8.2	326	986.8	986.6	74
7001	2023-07-18 20:20:00	9.9	8.4	328	987	986.8	76
7001	2023-07-18 20:30:00	9.8	7.8	329	987	986.8	77
7001	2023-07-18 20:40:00	9.6	7.8	325	986.9	986.7	79
7001	2023-07-18 20:50:00	9.5	7.8	327	986.8	986.6	81
7001	2023-07-18 21:00:00	9.3	7.3	327	987.2	987	83
7001	2023-07-18 21:10:00	9	8.1	326	987	986.8	84
7001	2023-07-18 21:20:00	8.9	7.3	326	987.1	986.9	85
7001	2023-07-18 21:30:00	8.8	7.2	325	987	986.8	85
7001	2023-07-18 21:40:00	8.7	7.2	326	987	986.8	86
7001	2023-07-18 21:50:00	8.7	7.4	324	987	986.8	86
7001	2023-07-18 22:00:00	8.7	6.7	327	987	986.8	87
7001	2023-07-18 22:10:00	8.7	7.6	333	986.8	986.6	85
7001	2023-07-18 22:20:00	8.6	7.5	336	986.8	986.6	86
7001	2023-07-18 22:30:00	8.6	7.5	335	986.8	986.6	87
7001	2023-07-18 22:40:00	8.5	7.3	334	986.9	986.7	87
7001	2023-07-18 22:50:00	8.5	7.1	337	986.9	986.7	88
7001	2023-07-18 23:00:00	8.3	7.5	339	986.8	986.6	90
7001	2023-07-18 23:10:00	8.2	7.4	336	986.9	986.7	90
7001	2023-07-18 23:20:00	8.2	7.2	335	987	986.8	91
7001	2023-07-18 23:30:00	8	6.7	330	987	986.8	92
7001	2023-07-18 23:40:00	8	6.8	330	986.9	986.7	93
7001	2023-07-18 23:50:00	7.9	6.2	331	987	986.8	93
7001	2023-07-19	7.8	6.1	324	987	986.8	94
7001	2023-07-19 00:10:00	7.8	5.6	322	987.1	986.9	95
7001	2023-07-19 00:20:00	7.8	5.5	324	987.2	987	95
7001	2023-07-19 00:30:00	7.8	5.4	322	987.3	987.1	95
7001	2023-07-19 00:40:00	7.8	5.3	321	987.3	987.1	95
7001	2023-07-19 00:50:00	7.7	5.6	324	987.3	987.1	96
7001	2023-07-19 01:00:00	7.6	5.7	324	987.3	987.1	96
7001	2023-07-19 01:10:00	7.7	5.4	324	987.3	987.1	97
7001	2023-07-19 01:20:00	7.4	5	320	987.3	987.1	97
7001	2023-07-19 01:30:00	7.5	5.2	324	987.2	987	97
7001	2023-07-19 01:40:00	7.6	5.6	326	987.3	987.1	98
7001	2023-07-19 01:50:00	7.6	5.3	326	987.2	987	98
7001	2023-07-19 02:00:00	7.5	5.1	325	987.2	987	97
7001	2023-07-19 02:10:00	7.4	5.2	319	987.2	987	97
7001	2023-07-19 02:20:00	7.5	5.2	320	987.1	986.9	97
7001	2023-07-19 02:30:00	7.4	5.2	319	987.2	987	96
7001	2023-07-19 02:40:00	7.5	5.2	321	987.1	986.9	96
7001	2023-07-19 02:50:00	7.6	5.4	323	987.1	986.9	95
7001	2023-07-19 03:00:00	7.6	5.7	322	987.2	987	94
7001	2023-07-19 03:10:00	7.5	5.4	322	987.2	987	95
7001	2023-07-19 03:20:00	7.4	5.5	322	987.3	987.1	95
7001	2023-07-19 03:30:00	7.5	5.9	323	987.2	987	95
7001	2023-07-19 03:40:00	7.5	6.1	325	987.2	987	94
7001	2023-07-19 03:50:00	7.4	5.9	323	987.2	987	94
7001	2023-07-19 04:00:00	7.5	5.8	324	987.2	987	94
7001	2023-07-19 04:10:00	7.4	5.3	321	987.3	987.1	94
7001	2023-07-19 04:20:00	7.6	5.4	320	987.3	987.1	93
7001	2023-07-19 04:30:00	7.6	4.9	318	987.3	987.1	93
7001	2023-07-19 04:40:00	7.5	4.7	314	987.3	987.1	93
7001	2023-07-19 04:50:00	7.5	5.4	324	987.3	987.1	93
7001	2023-07-19 05:00:00	7.7	5.5	330	987.3	987.1	93
7001	2023-07-19 05:10:00	7.8	6.2	334	987.3	987.1	91
7001	2023-07-19 05:20:00	8	6.2	335	987.3	987.1	89
7001	2023-07-19 05:30:00	8	5.9	333	987.4	987.2	90
7001	2023-07-19 05:40:00	8.1	5.6	334	987.4	987.2	90
7001	2023-07-19 05:50:00	8	5.9	333	987.4	987.2	90
7001	2023-07-19 06:00:00	8	6	329	987.4	987.2	90
7001	2023-07-19 06:10:00	8	5.6	328	987.5	987.3	90
7001	2023-07-19 06:20:00	8.1	5.6	326	987.5	987.3	91
7001	2023-07-19 06:30:00	8.1	5.6	331	987.5	987.3	91
7001	2023-07-19 06:40:00	8.2	5.4	331	987.6	987.4	91
7001	2023-07-19 06:50:00	8.3	5.2	329	987.6	987.4	94
7001	2023-07-19 07:00:00	8.2	6.2	329	987.6	987.4	96
7001	2023-07-19 07:10:00	8.2	5.8	333	987.6	987.4	96
7001	2023-07-19 07:20:00	8.1	6.1	336	987.7	987.5	96
7001	2023-07-19 07:30:00	8.3	6	336	987.8	987.6	96
7001	2023-07-19 07:40:00	8.4	6.2	334	987.8	987.6	95
7001	2023-07-19 07:50:00	8.4	5.9	339	987.9	987.7	95
7001	2023-07-19 08:00:00	8.4	6.1	341	987.9	987.7	94
7001	2023-07-19 08:10:00	8.7	5.8	337	988.1	987.9	94
7001	2023-07-19 08:20:00	8.9	5.9	332	987.9	987.7	88
7001	2023-07-19 08:30:00	9.2	6.5	336	987.8	987.6	85
7001	2023-07-19 08:40:00	9.7	6.4	342	987.9	987.7	83
7001	2023-07-19 08:50:00	9.9	6.9	344	987.8	987.6	80
7001	2023-07-19 09:00:00	9.5	7.4	343	987.6	987.4	82
7001	2023-07-19 09:10:00	9.3	7.3	347	987.8	987.6	84
7001	2023-07-19 09:20:00	9.3	6.1	339	987.7	987.5	83
7001	2023-07-19 09:30:00	9.3	6.9	348	987.6	987.4	83
7001	2023-07-19 09:40:00	9.3	7.1	347	987.7	987.5	83
7001	2023-07-19 09:50:00	9.4	6.7	345	987.9	987.7	83
7001	2023-07-19 10:00:00	9.2	6.2	336	987.9	987.7	84
7001	2023-07-19 10:10:00	9.3	6.1	340	987.8	987.6	81
7001	2023-07-19 10:20:00	9.7	5.5	336	987.8	987.6	81
7001	2023-07-19 10:30:00	9.6	5.7	339	987.8	987.6	82
7001	2023-07-19 10:40:00	10.1	5.9	334	987.9	987.7	83
7001	2023-07-19 10:50:00	9.6	6.5	334	987.7	987.5	79
7001	2023-07-19 11:00:00	9.8	6.5	335	987.7	987.5	79
7001	2023-07-19 11:10:00	10.4	6.1	332	987.7	987.5	74
7001	2023-07-19 11:20:00	11	6	336	987.8	987.6	73
7001	2023-07-19 11:30:00	11	5.6	329	987.8	987.6	71
7001	2023-07-19 11:40:00	11.3	5.6	332	987.7	987.5	67
7001	2023-07-19 11:50:00	11.4	5.8	316	987.6	987.4	67
7001	2023-07-19 12:00:00	10.8	6.9	329	987.4	987.2	69
7001	2023-07-19 12:10:00	10.1	7	331	987.6	987.4	74
7001	2023-07-19 12:20:00	10.7	6.4	335	987.7	987.5	73
7001	2023-07-19 12:30:00	11.2	6.2	327	987.9	987.7	71
7001	2023-07-19 12:40:00	11.4	5.8	316	987.9	987.7	69
7001	2023-07-19 12:50:00	11.3	5.5	324	987.8	987.6	67
7001	2023-07-19 13:00:00	11.1	5.8	319	987.8	987.6	68
7001	2023-07-19 13:10:00	11.6	5.3	318	987.8	987.6	68
7001	2023-07-19 13:20:00	12.3	5.9	317	987.9	987.7	69
7001	2023-07-19 13:30:00	11.6	6.1	322	987.7	987.5	69
7001	2023-07-19 13:40:00	11.6	5.8	317	987.8	987.6	71
7001	2023-07-19 13:50:00	11.7	5.6	323	987.7	987.5	70
7001	2023-07-19 14:00:00	12	5.6	327	987.7	987.5	70
7001	2023-07-19 14:10:00	11.7	6.2	319	987.5	987.3	70
7001	2023-07-19 14:20:00	11.8	6.1	337	987.5	987.3	71
7001	2023-07-19 14:30:00	11.7	6.3	332	987.5	987.3	72
7001	2023-07-19 14:40:00	11.7	6.3	330	987.5	987.3	71
7001	2023-07-19 14:50:00	11.7	5.7	323	987.5	987.3	71
7001	2023-07-19 15:00:00	11.4	6.2	327	987.4	987.2	74
7001	2023-07-19 15:10:00	11.8	6.2	327	987.4	987.2	72
7001	2023-07-19 15:20:00	11.8	6.6	324	987.4	987.2	73
7001	2023-07-19 15:30:00	11.7	7	331	987.2	987	73
7001	2023-07-19 15:40:00	11.4	6.7	333	987.3	987.1	75
7001	2023-07-19 15:50:00	11.8	6.5	333	987.3	987.1	73
7001	2023-07-19 16:00:00	12.2	6.8	333	987.4	987.2	73
7001	2023-07-19 16:10:00	11.5	6.6	328	987.1	986.9	75
7001	2023-07-19 16:20:00	11.9	6.7	324	987.1	986.9	75
7001	2023-07-19 16:30:00	11.3	6.7	326	986.9	986.7	76
7001	2023-07-19 16:40:00	11.5	6.5	327	986.8	986.6	73
7001	2023-07-19 16:50:00	11.1	6.9	334	986.8	986.6	76
7001	2023-07-19 17:00:00	11.1	6.6	332	986.5	986.3	74
7001	2023-07-19 17:10:00	11.9	6.4	333	986.9	986.7	73
7001	2023-07-19 17:20:00	11.1	6.3	322	987	986.8	76
7001	2023-07-19 17:30:00	11.1	6.7	329	986.7	986.5	76
7001	2023-07-19 17:40:00	11.4	7.4	335	986.9	986.7	75
7001	2023-07-19 17:50:00	11.2	6.9	330	986.8	986.6	75
7001	2023-07-19 18:00:00	11.1	6.6	335	986.6	986.4	74
7001	2023-07-19 18:10:00	11	6.7	332	986.5	986.3	76
7001	2023-07-19 18:20:00	11.7	6.4	331	987	986.8	75
7001	2023-07-19 18:30:00	11.3	6.6	318	986.6	986.4	74
7001	2023-07-19 18:40:00	11.7	6.8	310	986.9	986.7	74
7001	2023-07-19 18:50:00	11.3	6.5	309	986.8	986.6	76
7001	2023-07-19 19:00:00	11	6.7	315	986.9	986.7	78
7001	2023-07-19 19:10:00	10.8	6.3	315	986.7	986.5	77
7001	2023-07-19 19:20:00	11	6.3	317	986.7	986.5	77
7001	2023-07-19 19:30:00	10.9	6.1	319	986.5	986.3	77
7001	2023-07-19 19:40:00	10.6	5.9	323	986.6	986.4	80
7001	2023-07-19 19:50:00	10.5	5.7	324	986.4	986.2	80
7001	2023-07-19 20:00:00	10.1	5.9	323	986.3	986.1	81
7001	2023-07-19 20:10:00	10.2	6.2	320	986.3	986.1	83
7001	2023-07-19 20:20:00	10	6.6	320	986.3	986.1	84
7001	2023-07-19 20:30:00	10	6.8	320	986.3	986.1	85
7001	2023-07-19 20:40:00	9.8	7.1	319	986.2	986	85
7001	2023-07-19 20:50:00	9.5	6.7	325	986.1	985.9	87
7001	2023-07-19 21:00:00	9.5	6.4	323	986.1	985.9	87
7001	2023-07-19 21:10:00	9.4	6.1	330	986.1	985.9	88
7001	2023-07-19 21:20:00	9.4	6.5	327	986.1	985.9	88
7001	2023-07-19 21:30:00	9.3	6.2	325	986.1	985.9	89
7001	2023-07-19 21:40:00	9.2	6.2	323	986.1	985.9	92
7001	2023-07-19 21:50:00	9.1	6.1	330	986.1	985.9	92
7001	2023-07-19 22:00:00	9.1	6.5	327	986	985.8	92
7001	2023-07-19 22:10:00	9.1	5.9	329	986	985.8	93
7001	2023-07-19 22:20:00	9	5.9	326	986	985.8	94
7001	2023-07-19 22:30:00	8.9	5.9	324	986	985.8	95
7001	2023-07-19 22:40:00	8.9	5.7	322	986	985.8	95
7001	2023-07-19 22:50:00	8.9	5	321	986	985.8	96
7001	2023-07-19 23:00:00	8.8	5.2	322	985.9	985.7	96
7001	2023-07-19 23:10:00	8.8	4.8	325	985.9	985.7	97
7001	2023-07-19 23:20:00	8.8	4.8	323	985.9	985.7	97
7001	2023-07-19 23:30:00	8.8	4.7	320	985.9	985.7	97
7001	2023-07-19 23:40:00	8.8	4.9	323	985.8	985.6	97
7001	2023-07-19 23:50:00	8.8	5.2	321	985.8	985.6	98
7001	2023-07-20	8.8	5	323	985.8	985.6	98
7001	2023-07-20 00:10:00	8.8	5.3	325	985.8	985.6	98
7001	2023-07-20 00:20:00	8.8	5.6	322	985.7	985.5	98
7001	2023-07-20 00:30:00	8.8	5.3	325	985.7	985.5	98
7001	2023-07-20 00:40:00	8.8	5.6	325	985.6	985.4	98
7001	2023-07-20 00:50:00	8.7	5.5	327	985.5	985.3	98
7001	2023-07-20 01:00:00	8.7	5.5	325	985.5	985.3	99
7001	2023-07-20 01:10:00	8.7	5.5	321	985.4	985.2	99
7001	2023-07-20 01:20:00	8.7	5.3	321	985.4	985.2	99
7001	2023-07-20 01:30:00	8.8	5.2	321	985.4	985.2	99
7001	2023-07-20 01:40:00	8.7	5.1	321	985.3	985.1	99
7001	2023-07-20 01:50:00	8.7	4.1	325	985.4	985.2	99
7001	2023-07-20 02:00:00	8.7	4.1	325	985.3	985.1	99
7001	2023-07-20 02:10:00	8.7	3.7	323	985.3	985.1	99
7001	2023-07-20 02:20:00	8.7	4	325	985.1	984.9	99
7001	2023-07-20 02:30:00	8.7	4.1	328	985.1	984.9	99
7001	2023-07-20 02:40:00	8.7	4.1	327	985	984.8	99
7001	2023-07-20 02:50:00	8.6	3.9	325	985	984.8	99
7001	2023-07-20 03:00:00	8.6	4	326	984.9	984.7	99
7001	2023-07-20 03:10:00	8.6	3.9	329	984.8	984.6	99
7001	2023-07-20 03:20:00	8.6	3.7	328	984.8	984.6	99
7001	2023-07-20 03:30:00	8.6	3.3	333	984.8	984.6	99
7001	2023-07-20 03:40:00	8.6	3.2	329	984.8	984.6	99
7001	2023-07-20 03:50:00	8.5	3.3	322	984.7	984.5	100
7001	2023-07-20 04:00:00	8.6	3.1	320	984.7	984.5	100
7001	2023-07-20 04:10:00	8.5	3.2	319	984.7	984.5	100
7001	2023-07-20 04:20:00	8.5	3	318	984.6	984.4	100
7001	2023-07-20 04:30:00	8.5	3.1	316	984.6	984.4	100
7001	2023-07-20 04:40:00	8.5	3	315	984.5	984.3	100
7001	2023-07-20 04:50:00	8.5	3	309	984.5	984.3	100
7001	2023-07-20 05:00:00	8.5	3.2	314	984.5	984.3	100
7001	2023-07-20 05:10:00	8.5	3.3	313	984.5	984.3	100
7001	2023-07-20 05:20:00	8.5	3.3	315	984.4	984.2	100
7001	2023-07-20 05:30:00	8.5	3.5	315	984.3	984.1	100
7001	2023-07-20 05:40:00	8.6	3.5	320	984.3	984.1	100
7001	2023-07-20 05:50:00	8.6	3.8	320	984.2	984	100
7001	2023-07-20 06:00:00	8.7	3.7	323	984.2	984	100
7001	2023-07-20 06:10:00	8.7	3.8	324	984.1	983.9	100
7001	2023-07-20 06:20:00	8.7	4.1	323	984.1	983.9	100
7001	2023-07-20 06:30:00	8.8	4	319	984.1	983.9	100
7001	2023-07-20 06:40:00	8.8	4.1	315	984.1	983.9	100
7001	2023-07-20 06:50:00	8.8	4.1	311	984	983.8	100
7001	2023-07-20 07:00:00	8.9	3.9	307	984	983.8	100
7001	2023-07-20 07:10:00	8.9	4	307	984	983.8	100
7001	2023-07-20 07:20:00	8.8	4.4	313	984	983.8	100
7001	2023-07-20 07:30:00	8.9	4.6	319	984	983.8	100
7001	2023-07-20 07:40:00	9.1	4.5	319	983.9	983.7	100
7001	2023-07-20 07:50:00	9	4.8	321	983.9	983.7	99
7001	2023-07-20 08:00:00	9.2	4.9	317	983.9	983.7	99
7001	2023-07-20 08:10:00	9.2	5	318	983.9	983.7	99
7001	2023-07-20 08:20:00	9.3	5.3	319	983.8	983.6	98
7001	2023-07-20 08:30:00	9.3	5.4	324	983.8	983.6	98
7001	2023-07-20 08:40:00	9.3	5	319	983.7	983.5	97
7001	2023-07-20 08:50:00	9.4	4.9	323	983.7	983.5	96
7001	2023-07-20 09:00:00	9.4	5	324	983.6	983.4	95
7001	2023-07-20 09:10:00	9.5	4.4	318	983.6	983.4	94
7001	2023-07-20 09:20:00	9.6	4.1	315	983.6	983.4	94
7001	2023-07-20 09:30:00	9.6	4.2	321	983.7	983.5	94
7001	2023-07-20 09:40:00	9.5	4.2	318	983.6	983.4	95
7001	2023-07-20 09:50:00	9.5	4.3	318	983.6	983.4	96
7001	2023-07-20 10:00:00	9.4	4.5	326	983.6	983.4	97
7001	2023-07-20 10:10:00	9.3	4.1	323	983.6	983.4	96
7001	2023-07-20 10:20:00	9.4	4.2	324	983.6	983.4	96
7001	2023-07-20 10:30:00	9.4	4	319	983.6	983.4	96
7001	2023-07-20 10:40:00	9.4	3.7	323	983.5	983.3	96
7001	2023-07-20 10:50:00	9.3	3.5	312	983.4	983.2	96
7001	2023-07-20 11:00:00	9.4	3.8	309	983.5	983.3	96
7001	2023-07-20 11:10:00	9.5	4	315	983.4	983.2	97
7001	2023-07-20 11:20:00	9.5	4.4	318	983.4	983.2	97
7001	2023-07-20 11:30:00	9.5	4.5	322	983.4	983.2	96
7001	2023-07-20 11:40:00	9.7	4	323	983.3	983.1	96
7001	2023-07-20 11:50:00	9.6	4.3	323	983.2	983	95
7001	2023-07-20 12:00:00	9.7	4.2	318	983.2	983	95
7001	2023-07-20 12:10:00	9.8	3.8	309	983.2	983	94
7001	2023-07-20 12:20:00	9.7	3.8	317	983.1	982.9	93
7001	2023-07-20 12:30:00	9.8	4.1	309	983.1	982.9	94
7001	2023-07-20 12:40:00	9.9	4	317	983.1	982.9	94
7001	2023-07-20 12:50:00	9.8	3.7	323	983.1	982.9	94
7001	2023-07-20 13:00:00	9.9	3.7	319	983	982.8	94
7001	2023-07-20 13:10:00	10	3.9	320	983	982.8	94
7001	2023-07-20 13:20:00	10	3.9	314	983	982.8	94
7001	2023-07-20 13:30:00	10.1	3.3	308	983	982.8	93
7001	2023-07-20 13:40:00	10.2	3	301	983	982.8	93
7001	2023-07-20 13:50:00	10.2	2.9	304	983	982.8	93
7001	2023-07-20 14:00:00	10.4	3.2	297	982.9	982.7	94
7001	2023-07-20 14:10:00	10.5	3.7	294	982.8	982.6	92
7001	2023-07-20 14:20:00	10.4	3.8	291	982.8	982.6	92
7001	2023-07-20 14:30:00	10.4	4	294	982.8	982.6	92
7001	2023-07-20 14:40:00	10.6	4.4	293	982.7	982.5	93
7001	2023-07-20 14:50:00	10.5	4.6	294	982.7	982.5	92
7001	2023-07-20 15:00:00	10.4	4.2	291	982.7	982.5	91
7001	2023-07-20 15:10:00	10.4	4	297	982.6	982.4	90
7001	2023-07-20 15:20:00	10.5	3.9	293	982.6	982.4	89
7001	2023-07-20 15:30:00	10.3	4.1	297	982.6	982.4	89
7001	2023-07-20 15:40:00	10.4	4.1	290	982.6	982.4	88
7001	2023-07-20 15:50:00	10.3	4	295	982.5	982.3	88
7001	2023-07-20 16:00:00	10.3	3.9	289	982.4	982.2	89
7001	2023-07-20 16:10:00	10.5	3.9	290	982.5	982.3	89
7001	2023-07-20 16:20:00	10.5	3.8	293	982.4	982.2	89
7001	2023-07-20 16:30:00	10.4	3.6	293	982.3	982.1	88
7001	2023-07-20 16:40:00	10.5	3.5	284	982.2	982	88
7001	2023-07-20 16:50:00	10.4	3.6	289	982.2	982	88
7001	2023-07-20 17:00:00	10.7	3.9	283	982.3	982.1	86
7001	2023-07-20 17:10:00	10.6	3.9	276	982.2	982	84
7001	2023-07-20 17:20:00	10.6	3.7	281	982.2	982	85
7001	2023-07-20 17:30:00	10.4	3.7	292	982.1	981.9	85
7001	2023-07-20 17:40:00	10.6	3.5	296	982.1	981.9	84
7001	2023-07-20 17:50:00	10.5	3.5	287	982.1	981.9	85
7001	2023-07-20 18:00:00	10.5	3.2	293	982	981.8	85
7001	2023-07-20 18:10:00	10.5	3.4	289	982	981.8	86
7001	2023-07-20 18:20:00	10.4	3.2	294	982	981.8	87
7001	2023-07-20 18:30:00	10.4	3.1	291	982.1	981.9	88
7001	2023-07-20 18:40:00	10.5	3.1	298	982.1	981.9	89
7001	2023-07-20 18:50:00	10.5	3.1	300	982.1	981.9	90
7001	2023-07-20 19:00:00	10.5	3.2	306	982.1	981.9	91
7001	2023-07-20 19:10:00	10.4	3.1	307	982	981.8	91
7001	2023-07-20 19:20:00	10.4	3.2	317	982	981.8	90
7001	2023-07-20 19:30:00	10.4	2.7	317	981.9	981.7	90
7001	2023-07-20 19:40:00	10.4	2.3	316	982	981.8	91
7001	2023-07-20 19:50:00	10.3	2.6	323	982.1	981.9	93
7001	2023-07-20 20:00:00	10.2	3.2	318	982.1	981.9	94
7001	2023-07-20 20:10:00	10.1	2.8	297	982.1	981.9	95
7001	2023-07-20 20:20:00	10	2.4	288	982.1	981.9	95
7001	2023-07-20 20:30:00	10	2.2	297	982	981.8	95
7001	2023-07-20 20:40:00	9.9	1.5	303	981.9	981.7	96
7001	2023-07-20 20:50:00	9.9	1	325	981.8	981.6	96
7001	2023-07-20 21:00:00	9.9	0.8	347	981.9	981.7	96
7001	2023-07-20 21:10:00	9.9	0.9	319	981.9	981.7	96
7001	2023-07-20 21:20:00	9.9	0.6	302	981.9	981.7	96
7001	2023-07-20 21:30:00	9.9	1.2	341	982	981.8	96
7001	2023-07-20 21:40:00	9.9	1	336	982	981.8	96
7001	2023-07-20 21:50:00	9.8	0.2	357	981.9	981.7	96
7001	2023-07-20 22:00:00	9.8	0.1	0	981.9	981.7	96
7001	2023-07-20 22:10:00	9.8	0.3	49	981.9	981.7	96
7001	2023-07-20 22:20:00	9.6	0.8	54	981.8	981.6	95
7001	2023-07-20 22:30:00	9.6	1.1	47	981.7	981.5	94
7001	2023-07-20 22:40:00	9.7	0.9	44	981.6	981.4	94
7001	2023-07-20 22:50:00	9.7	0.8	19	981.6	981.4	95
7001	2023-07-20 23:00:00	9.8	0.5	316	981.7	981.5	95
7001	2023-07-20 23:10:00	9.7	1.5	297	981.7	981.5	97
7001	2023-07-20 23:20:00	9.6	1.5	288	981.7	981.5	97
7001	2023-07-20 23:30:00	9.5	1.4	270	981.7	981.5	97
7001	2023-07-20 23:40:00	9.4	0.8	256	981.7	981.5	98
7001	2023-07-20 23:50:00	9.4	1.1	224	981.7	981.5	98
7001	2023-07-21	9.4	3.3	187	981.6	981.4	98
7001	2023-07-21 00:10:00	9.3	4.3	192	981.5	981.3	98
7001	2023-07-21 00:20:00	9.3	5	187	981.5	981.3	98
7001	2023-07-21 00:30:00	9.4	4.6	179	981.5	981.3	98
7001	2023-07-21 00:40:00	9.4	4.5	173	981.4	981.2	98
7001	2023-07-21 00:50:00	9.4	4.3	181	981.4	981.2	98
7001	2023-07-21 01:00:00	9.3	4.6	182	981.4	981.2	98
7001	2023-07-21 01:10:00	9.3	4.4	174	981.3	981.1	98
7001	2023-07-21 01:20:00	9.2	5.1	174	981.1	980.9	98
7001	2023-07-21 01:30:00	9.2	5.6	175	981	980.8	98
7001	2023-07-21 01:40:00	9.3	5.7	176	981	980.8	98
7001	2023-07-21 01:50:00	9.3	5.8	175	980.9	980.7	98
7001	2023-07-21 02:00:00	9.3	6.1	175	980.8	980.6	98
7001	2023-07-21 02:10:00	9.3	6.4	171	980.7	980.5	98
7001	2023-07-21 02:20:00	9.4	6.8	171	980.6	980.4	98
7001	2023-07-21 02:30:00	9.4	6.6	167	980.5	980.3	98
7001	2023-07-21 02:40:00	9.3	7.2	169	980.5	980.3	98
7001	2023-07-21 02:50:00	9.4	7	172	980.5	980.3	98
7001	2023-07-21 03:00:00	9.5	6	154	980.5	980.3	98
7001	2023-07-21 03:10:00	9.5	6.9	143	980.3	980.1	99
7001	2023-07-21 03:20:00	9.5	7.2	142	980.4	980.2	99
7001	2023-07-21 03:30:00	9.5	7.7	146	980.4	980.2	99
7001	2023-07-21 03:40:00	9.6	7.8	143	980.3	980.1	99
7001	2023-07-21 03:50:00	9.5	7.7	142	980.4	980.2	99
7001	2023-07-21 04:00:00	9.6	8	147	980.2	980	99
7001	2023-07-21 04:10:00	9.7	8.3	139	980.2	980	98
7001	2023-07-21 04:20:00	9.8	9.3	147	980.1	979.9	96
7001	2023-07-21 04:30:00	9.9	8.8	148	980.1	979.9	95
7001	2023-07-21 04:40:00	9.9	9.2	145	980.1	979.9	93
7001	2023-07-21 04:50:00	9.9	9.1	144	980	979.8	93
7001	2023-07-21 05:00:00	9.8	9.4	149	980	979.8	93
7001	2023-07-21 05:10:00	9.7	10.2	150	979.9	979.7	93
7001	2023-07-21 05:20:00	9.8	9.4	148	979.9	979.7	94
7001	2023-07-21 05:30:00	9.9	9.7	152	980	979.8	94
7001	2023-07-21 05:40:00	9.9	9.4	147	979.8	979.6	94
7001	2023-07-21 05:50:00	9.8	9.9	144	979.9	979.7	94
7001	2023-07-21 06:00:00	9.7	10.2	142	979.7	979.5	94
7001	2023-07-21 06:10:00	9.8	9.8	144	979.7	979.5	94
7001	2023-07-21 06:20:00	9.7	10.5	146	979.6	979.4	95
7001	2023-07-21 06:30:00	9.6	9.9	143	979.5	979.3	96
7001	2023-07-21 06:40:00	9.6	9.7	142	979.6	979.4	96
7001	2023-07-21 06:50:00	9.5	10.2	144	979.5	979.3	96
7001	2023-07-21 07:00:00	9.7	10.3	142	979.6	979.4	96
7001	2023-07-21 07:10:00	9.6	9.8	148	979.5	979.3	96
7001	2023-07-21 07:20:00	9.5	10.6	146	979.6	979.4	96
7001	2023-07-21 07:30:00	9.6	10.4	143	979.6	979.4	96
7001	2023-07-21 07:40:00	9.7	9.7	141	979.6	979.4	95
7001	2023-07-21 07:50:00	9.7	10	146	979.5	979.3	95
7001	2023-07-21 08:00:00	9.7	9.3	139	979.7	979.5	95
7001	2023-07-21 08:10:00	9.8	10	146	979.5	979.3	94
7001	2023-07-21 08:20:00	9.9	9.9	141	979.5	979.3	94
7001	2023-07-21 08:30:00	9.8	9.4	138	979.5	979.3	94
7001	2023-07-21 08:40:00	9.8	10	140	979.4	979.2	93
7001	2023-07-21 08:50:00	10	10.5	145	979.2	979	93
7001	2023-07-21 09:00:00	10	10.3	145	979.1	978.9	93
7001	2023-07-21 09:10:00	10.2	10.8	143	979.1	978.9	93
7001	2023-07-21 09:20:00	10.2	11.3	147	978.6	978.4	91
7001	2023-07-21 09:30:00	10.2	11.9	147	978.6	978.4	90
7001	2023-07-21 09:40:00	10.5	11.9	150	978.8	978.6	91
7001	2023-07-21 09:50:00	10.3	11.8	147	978.4	978.2	90
7001	2023-07-21 10:00:00	10.3	12.5	147	978.5	978.3	90
7001	2023-07-21 10:10:00	10.5	11.8	142	978.6	978.4	90
7001	2023-07-21 10:20:00	10.3	12.3	144	978.5	978.3	90
7001	2023-07-21 10:30:00	10.7	12.1	149	978.8	978.6	88
7001	2023-07-21 10:40:00	10.7	12.4	144	978.8	978.6	88
7001	2023-07-21 10:50:00	10.6	12.6	142	978.5	978.3	88
7001	2023-07-21 11:00:00	11.4	11.9	141	978.9	978.7	86
7001	2023-07-21 11:10:00	11.2	13	147	978.5	978.3	86
7001	2023-07-21 11:20:00	11.3	13	150	978.6	978.4	86
7001	2023-07-21 11:30:00	11.4	12.6	138	978.9	978.7	84
7001	2023-07-21 11:40:00	11.1	13.1	144	978.7	978.5	85
7001	2023-07-21 11:50:00	11	12.8	140	978.8	978.6	86
7001	2023-07-21 12:00:00	10.6	12.9	141	978.6	978.4	88
7001	2023-07-21 12:10:00	10.7	12.9	144	978.7	978.5	88
7001	2023-07-21 12:20:00	10.8	13.5	145	978.7	978.5	88
7001	2023-07-21 12:30:00	10.7	13.5	142	978.8	978.6	88
7001	2023-07-21 12:40:00	10.9	13.8	143	978.6	978.4	87
7001	2023-07-21 12:50:00	10.9	13.3	142	978.9	978.7	88
7001	2023-07-21 13:00:00	10.9	13.3	148	978.6	978.4	87
7001	2023-07-21 13:10:00	11.1	13.2	144	978.6	978.4	86
7001	2023-07-21 13:20:00	11.7	13.3	146	978.9	978.7	86
7001	2023-07-21 13:30:00	11.7	13.7	149	978.7	978.5	85
7001	2023-07-21 13:40:00	11	13.9	142	978.4	978.2	87
7001	2023-07-21 13:50:00	11.2	14.3	142	978.5	978.3	87
7001	2023-07-21 14:00:00	11.2	14.8	142	978.1	977.9	86
7001	2023-07-21 14:10:00	11.5	14.1	146	978.4	978.2	86
7001	2023-07-21 14:20:00	11.4	13.7	147	978.2	978	85
7001	2023-07-21 14:30:00	11	13.4	145	977.9	977.7	86
7001	2023-07-21 14:40:00	11	13.2	145	977.9	977.7	86
7001	2023-07-21 14:50:00	10.9	14.6	147	977.6	977.4	86
7001	2023-07-21 15:00:00	10.5	15.1	145	977.9	977.7	89
7001	2023-07-21 15:10:00	10.8	14.5	147	978.2	978	89
7001	2023-07-21 15:20:00	10.7	15	148	977.8	977.6	88
7001	2023-07-21 15:30:00	10.6	15	148	977.9	977.7	89
7001	2023-07-21 15:40:00	10.6	14.2	147	977.7	977.5	88
7001	2023-07-21 15:50:00	10.8	14.2	150	977.7	977.5	88
7001	2023-07-21 16:00:00	10.8	13.4	148	978.1	977.9	88
7001	2023-07-21 16:10:00	10.8	14.4	148	977.7	977.5	89
7001	2023-07-21 16:20:00	10.7	14.1	147	978	977.8	89
7001	2023-07-21 16:30:00	10.6	13.6	149	977.9	977.7	90
7001	2023-07-21 16:40:00	10.5	13	147	978.2	978	90
7001	2023-07-21 16:50:00	10.3	13.6	147	977.9	977.7	89
7001	2023-07-21 17:00:00	10.3	12.9	148	977.9	977.7	90
7001	2023-07-21 17:10:00	10.3	13.5	147	977.9	977.7	90
7001	2023-07-21 17:20:00	10.2	13	145	978	977.8	90
7001	2023-07-21 17:30:00	10	12.8	142	978	977.8	92
7001	2023-07-21 17:40:00	10.2	12.7	148	978.3	978.1	91
7001	2023-07-21 17:50:00	10.1	12.3	143	978.2	978	92
7001	2023-07-21 18:00:00	10.1	12.5	142	978.1	977.9	92
7001	2023-07-21 18:10:00	10	13	146	977.8	977.6	92
7001	2023-07-21 18:20:00	10.1	13.1	145	977.9	977.7	92
7001	2023-07-21 18:30:00	10	13.6	145	977.3	977.1	91
7001	2023-07-21 18:40:00	9.9	13.6	148	977.5	977.3	92
7001	2023-07-21 18:50:00	10.1	13.7	149	977.5	977.3	91
7001	2023-07-21 19:00:00	10	13.4	148	977.6	977.4	91
7001	2023-07-21 19:10:00	9.8	13.1	146	977.7	977.5	92
7001	2023-07-21 19:20:00	9.9	12.5	142	977.9	977.7	92
7001	2023-07-21 19:30:00	9.8	12.7	138	978.2	978	93
7001	2023-07-21 19:40:00	9.5	13.1	144	977.7	977.5	93
7001	2023-07-21 19:50:00	9.5	12.1	145	978	977.8	94
7001	2023-07-21 20:00:00	9.6	11.4	144	978.2	978	93
7001	2023-07-21 20:10:00	9.7	11.7	150	978.2	978	93
7001	2023-07-21 20:20:00	9.5	11.2	159	978.2	978	93
7001	2023-07-21 20:30:00	9.5	11	163	978.2	978	94
7001	2023-07-21 20:40:00	9.5	10	159	978.4	978.2	94
7001	2023-07-21 20:50:00	9.5	10.6	163	978.3	978.1	94
7001	2023-07-21 21:00:00	9.6	9.7	161	978.5	978.3	93
7001	2023-07-21 21:10:00	9.7	9.8	150	978.6	978.4	91
7001	2023-07-21 21:20:00	9.8	9.7	143	978.8	978.6	91
7001	2023-07-21 21:30:00	9.9	10.5	147	978.6	978.4	90
7001	2023-07-21 21:40:00	9.9	9.7	147	978.8	978.6	90
7001	2023-07-21 21:50:00	9.7	9.1	137	978.9	978.7	91
7001	2023-07-21 22:00:00	9.8	9.1	140	978.8	978.6	90
7001	2023-07-21 22:10:00	9.7	9.6	144	978.5	978.3	90
7001	2023-07-21 22:20:00	9.7	10.4	146	978.6	978.4	90
7001	2023-07-21 22:30:00	9.7	10.1	145	978.6	978.4	91
7001	2023-07-21 22:40:00	9.7	9.7	139	978.7	978.5	91
7001	2023-07-21 22:50:00	9.7	9.5	139	978.8	978.6	91
7001	2023-07-21 23:00:00	9.6	10	130	978.9	978.7	90
7001	2023-07-21 23:10:00	9.6	10.2	133	978.9	978.7	91
7001	2023-07-21 23:20:00	9.5	10.1	132	978.9	978.7	90
7001	2023-07-21 23:30:00	9.4	10.4	137	978.9	978.7	90
7001	2023-07-21 23:40:00	9.5	10.2	135	979.1	978.9	90
7001	2023-07-21 23:50:00	9.3	10.2	134	979	978.8	90
7001	2023-07-22	9.3	9.7	133	979.1	978.9	90
7001	2023-07-22 00:10:00	9.3	10.6	138	979	978.8	90
7001	2023-07-22 00:20:00	9.2	10.3	138	978.9	978.7	90
7001	2023-07-22 00:30:00	9.2	11.1	139	978.8	978.6	89
7001	2023-07-22 00:40:00	9.2	11.6	139	978.6	978.4	90
7001	2023-07-22 00:50:00	9.2	12	138	978.5	978.3	90
7001	2023-07-22 01:00:00	9.3	11.4	132	978.5	978.3	91
7001	2023-07-22 01:10:00	9	12	136	978.3	978.1	90
7001	2023-07-22 01:20:00	9.1	11.9	136	978.6	978.4	90
7001	2023-07-22 01:30:00	9.1	10	131	978.9	978.7	90
7001	2023-07-22 01:40:00	9.2	10.3	128	978.9	978.7	89
7001	2023-07-22 01:50:00	9	9.7	132	978.9	978.7	89
7001	2023-07-22 02:00:00	9.1	10.3	125	979.1	978.9	89
7001	2023-07-22 02:10:00	9.2	9.6	129	979	978.8	89
7001	2023-07-22 02:20:00	9.3	9.2	134	979.1	978.9	89
7001	2023-07-22 02:30:00	9.3	9.3	140	979.1	978.9	90
7001	2023-07-22 02:40:00	9.3	9.9	144	979	978.8	90
7001	2023-07-22 02:50:00	9.4	9.3	143	979.1	978.9	90
7001	2023-07-22 03:00:00	9.3	9	139	979.2	979	90
7001	2023-07-22 03:10:00	9.4	8.7	143	979.2	979	90
7001	2023-07-22 03:20:00	9.3	9.2	140	979.3	979.1	88
7001	2023-07-22 03:30:00	9.2	9.1	139	979.1	978.9	87
7001	2023-07-22 03:40:00	9.2	10	142	979.1	978.9	87
7001	2023-07-22 03:50:00	9.3	9.9	143	979.1	978.9	87
7001	2023-07-22 04:00:00	9.3	9.8	144	979.2	979	86
7001	2023-07-22 04:10:00	9.3	9	140	979.4	979.2	88
7001	2023-07-22 04:20:00	9.3	8.7	137	979.4	979.2	88
7001	2023-07-22 04:30:00	9.3	9.2	138	979.4	979.2	87
7001	2023-07-22 04:40:00	9.3	9.7	143	979.4	979.2	87
7001	2023-07-22 04:50:00	9.3	8.6	143	979.3	979.1	85
7001	2023-07-22 05:00:00	9.4	8.3	137	979.5	979.3	85
7001	2023-07-22 05:10:00	9.4	9.8	143	979.2	979	84
7001	2023-07-22 05:20:00	9.3	9.6	144	979.4	979.2	84
7001	2023-07-22 05:30:00	9.3	9.6	142	979.4	979.2	85
7001	2023-07-22 05:40:00	9.4	9.6	136	979.7	979.5	85
7001	2023-07-22 05:50:00	9.4	8.9	136	979.6	979.4	84
7001	2023-07-22 06:00:00	9.3	9.5	137	979.5	979.3	84
7001	2023-07-22 06:10:00	9.4	9.4	139	979.6	979.4	85
7001	2023-07-22 06:20:00	9.3	10.2	140	979.6	979.4	86
7001	2023-07-22 06:30:00	9.3	9.8	136	979.6	979.4	84
7001	2023-07-22 06:40:00	9.4	10.3	139	979.8	979.6	83
7001	2023-07-22 06:50:00	9.4	8.6	134	980.1	979.9	85
7001	2023-07-22 07:00:00	9.4	8.6	141	980.1	979.9	85
7001	2023-07-22 07:10:00	9.4	8.9	139	980.2	980	84
7001	2023-07-22 07:20:00	9.4	8.4	131	980.2	980	86
7001	2023-07-22 07:30:00	9.4	8.6	139	980.3	980.1	86
7001	2023-07-22 07:40:00	9.5	7.8	141	980.5	980.3	85
7001	2023-07-22 07:50:00	9.6	7.7	140	980.5	980.3	84
7001	2023-07-22 08:00:00	9.7	7.7	147	980.7	980.5	83
7001	2023-07-22 08:10:00	9.9	8	148	980.6	980.4	82
7001	2023-07-22 08:20:00	10.2	6.5	136	981	980.8	82
7001	2023-07-22 08:30:00	10.3	5.8	124	981.1	980.9	81
7001	2023-07-22 08:40:00	10.4	5.2	139	981.2	981	80
7001	2023-07-22 08:50:00	10.2	5.8	121	981.2	981	81
7001	2023-07-22 09:00:00	10.4	5.5	119	981.4	981.2	81
7001	2023-07-22 09:10:00	10.1	5.6	118	981.5	981.3	81
7001	2023-07-22 09:20:00	10.3	5.8	130	981.6	981.4	81
7001	2023-07-22 09:30:00	10.1	5.7	150	981.6	981.4	82
7001	2023-07-22 09:40:00	10.4	5.1	131	981.8	981.6	80
7001	2023-07-22 09:50:00	10.3	5.4	140	981.7	981.5	81
7001	2023-07-22 10:00:00	10.4	5.5	142	981.7	981.5	80
7001	2023-07-22 10:10:00	10.2	6.4	150	981.8	981.6	80
7001	2023-07-22 10:20:00	10.3	5	141	982.1	981.9	80
7001	2023-07-22 10:30:00	10.4	4.2	121	982.1	981.9	80
7001	2023-07-22 10:40:00	10.6	4.2	118	982.2	982	79
7001	2023-07-22 10:50:00	10.7	3.7	120	982.3	982.1	78
7001	2023-07-22 11:00:00	10.9	4.7	135	982.2	982	78
7001	2023-07-22 11:10:00	11.2	5.7	142	982.5	982.3	78
7001	2023-07-22 11:20:00	11.2	6.4	148	982.2	982	75
7001	2023-07-22 11:30:00	11	5.5	139	982.6	982.4	76
7001	2023-07-22 11:40:00	11.4	4.6	135	982.6	982.4	74
7001	2023-07-22 11:50:00	11.4	5.7	148	982.5	982.3	74
7001	2023-07-22 12:00:00	11.7	5.1	142	982.7	982.5	73
7001	2023-07-22 12:10:00	11.5	6.5	153	982.4	982.2	73
7001	2023-07-22 12:20:00	11.6	6.5	165	982.7	982.5	73
7001	2023-07-22 12:30:00	11.6	6.2	165	982.7	982.5	73
7001	2023-07-22 12:40:00	11.4	6	161	982.7	982.5	72
7001	2023-07-22 12:50:00	11.8	4.6	167	983	982.8	72
7001	2023-07-22 13:00:00	11.4	3.6	152	983.1	982.9	74
7001	2023-07-22 13:10:00	11.5	2.2	155	983.2	983	73
7001	2023-07-22 13:20:00	11.2	2.8	173	983.2	983	74
7001	2023-07-22 13:30:00	11.2	3.8	191	983.4	983.2	75
7001	2023-07-22 13:40:00	11.5	4.4	195	983.4	983.2	75
7001	2023-07-22 13:50:00	11.2	4.2	197	983.4	983.2	75
7001	2023-07-22 14:00:00	11.2	4.1	191	983.5	983.3	74
7001	2023-07-22 14:10:00	11.1	3.5	192	983.7	983.5	74
7001	2023-07-22 14:20:00	11.1	3.9	183	983.7	983.5	74
7001	2023-07-22 14:30:00	11	4.2	182	983.8	983.6	74
7001	2023-07-22 14:40:00	11.3	3	178	984	983.8	74
7001	2023-07-22 14:50:00	11.3	2.9	185	984	983.8	73
7001	2023-07-22 15:00:00	11.5	2.2	189	984.1	983.9	73
7001	2023-07-22 15:10:00	11.4	0.7	307	984.3	984.1	76
7001	2023-07-22 15:20:00	11.2	1.7	0	984.3	984.1	76
7001	2023-07-22 15:30:00	11.3	2.3	0	984.2	984	78
7001	2023-07-22 15:40:00	11.3	3.3	359	984.3	984.1	75
7001	2023-07-22 15:50:00	11.4	3.3	293	984.3	984.1	75
7001	2023-07-22 16:00:00	11.5	2.5	255	984.5	984.3	76
7001	2023-07-22 16:10:00	11.5	1.9	290	984.6	984.4	75
7001	2023-07-22 16:20:00	11.3	1.8	283	984.7	984.5	75
7001	2023-07-22 16:30:00	11.5	1.6	275	984.7	984.5	74
7001	2023-07-22 16:40:00	11.4	3.7	326	984.5	984.3	77
7001	2023-07-22 16:50:00	11.6	3.4	340	984.7	984.5	77
7001	2023-07-22 17:00:00	11.5	3.7	343	984.7	984.5	77
7001	2023-07-22 17:10:00	11.5	3.4	0	984.7	984.5	76
7001	2023-07-22 17:20:00	11.7	4	0	984.7	984.5	77
7001	2023-07-22 17:30:00	11.2	4.9	346	984.6	984.4	78
7001	2023-07-22 17:40:00	11.1	4.8	348	984.8	984.6	78
7001	2023-07-22 17:50:00	11.1	4.9	348	984.8	984.6	78
7001	2023-07-22 18:00:00	11	4.8	353	984.7	984.5	78
7001	2023-07-22 18:10:00	11.1	4.5	355	985	984.8	79
7001	2023-07-22 18:20:00	11.1	4.7	352	984.9	984.7	78
7001	2023-07-22 18:30:00	11.4	4.7	354	984.9	984.7	77
7001	2023-07-22 18:40:00	11.3	5	349	984.9	984.7	78
7001	2023-07-22 18:50:00	11.2	5	343	985	984.8	78
7001	2023-07-22 19:00:00	11.1	5.2	351	984.9	984.7	79
7001	2023-07-22 19:10:00	11	4.8	0	985	984.8	79
7001	2023-07-22 19:20:00	10.9	4.7	0	985.1	984.9	79
7001	2023-07-22 19:30:00	10.9	4.8	0	985.1	984.9	80
7001	2023-07-22 19:40:00	10.9	5.2	349	985.3	985.1	81
7001	2023-07-22 19:50:00	10.5	5.2	340	985.4	985.2	82
7001	2023-07-22 20:00:00	10.6	5	341	985.5	985.3	82
7001	2023-07-22 20:10:00	10.4	4.7	340	985.5	985.3	83
7001	2023-07-22 20:20:00	10.3	4.9	341	985.6	985.4	83
7001	2023-07-22 20:30:00	10.1	5.4	346	985.6	985.4	83
7001	2023-07-22 20:40:00	10.2	5.2	342	985.7	985.5	83
7001	2023-07-22 20:50:00	10.1	4.8	341	985.7	985.5	83
7001	2023-07-22 21:00:00	10.1	4.6	341	985.8	985.6	82
7001	2023-07-22 21:10:00	10	4.3	345	985.8	985.6	82
7001	2023-07-22 21:20:00	10	4.4	342	985.9	985.7	84
7001	2023-07-22 21:30:00	9.9	3.8	343	986	985.8	85
7001	2023-07-22 21:40:00	9.9	3.9	354	985.9	985.7	86
7001	2023-07-22 21:50:00	9.8	3.8	353	986.1	985.9	87
7001	2023-07-22 22:00:00	9.8	4.2	342	986.2	986	87
7001	2023-07-22 22:10:00	9.8	4.1	347	986.2	986	88
7001	2023-07-22 22:20:00	9.8	4.1	350	986.3	986.1	88
7001	2023-07-22 22:30:00	9.7	4.2	349	986.3	986.1	89
7001	2023-07-22 22:40:00	9.6	4.3	348	986.3	986.1	91
7001	2023-07-22 22:50:00	9.5	4.3	350	986.3	986.1	91
7001	2023-07-22 23:00:00	9.4	4	349	986.4	986.2	92
7001	2023-07-22 23:10:00	9.3	3.8	350	986.5	986.3	94
7001	2023-07-22 23:20:00	9.3	3.6	346	986.6	986.4	94
7001	2023-07-22 23:30:00	9.2	3.6	345	986.6	986.4	95
7001	2023-07-22 23:40:00	9.3	3.6	344	986.7	986.5	96
7001	2023-07-22 23:50:00	9.3	3.7	346	986.6	986.4	96
7001	2023-07-23	9.3	3.8	346	986.7	986.5	96
7001	2023-07-23 00:10:00	9.3	4.2	344	986.8	986.6	96
7001	2023-07-23 00:20:00	9.3	4	345	986.8	986.6	96
7001	2023-07-23 00:30:00	9.3	4.2	343	986.8	986.6	96
7001	2023-07-23 00:40:00	9.3	4.1	343	986.8	986.6	95
7001	2023-07-23 00:50:00	9.4	4	341	986.8	986.6	95
7001	2023-07-23 01:00:00	9.4	4.1	346	986.8	986.6	95
7001	2023-07-23 01:10:00	9.4	4.2	344	986.7	986.5	94
7001	2023-07-23 01:20:00	9.4	3.9	341	986.7	986.5	93
7001	2023-07-23 01:30:00	9.4	3.8	344	986.7	986.5	93
7001	2023-07-23 01:40:00	9.4	3.8	345	986.7	986.5	92
7001	2023-07-23 01:50:00	9.3	3.8	335	986.6	986.4	93
7001	2023-07-23 02:00:00	9.1	3	327	986.6	986.4	95
7001	2023-07-23 02:10:00	9	3.1	327	986.6	986.4	96
7001	2023-07-23 02:20:00	9	3.4	327	986.6	986.4	97
7001	2023-07-23 02:30:00	9	3.2	327	986.6	986.4	97
7001	2023-07-23 02:40:00	9	3.6	331	986.5	986.3	97
7001	2023-07-23 02:50:00	9.1	3.8	332	986.5	986.3	97
7001	2023-07-23 03:00:00	9.1	4.4	332	986.5	986.3	97
7001	2023-07-23 03:10:00	9.2	4.4	334	986.5	986.3	97
7001	2023-07-23 03:20:00	9.1	4.2	329	986.4	986.2	97
7001	2023-07-23 03:30:00	9.1	3.6	325	986.5	986.3	97
7001	2023-07-23 03:40:00	9.1	3.4	323	986.4	986.2	98
7001	2023-07-23 03:50:00	9	4.5	336	986.2	986	97
7001	2023-07-23 04:00:00	9.1	4.1	335	986.3	986.1	96
7001	2023-07-23 04:10:00	9	3.2	322	986.4	986.2	97
7001	2023-07-23 04:20:00	8.9	3.3	325	986.4	986.2	97
7001	2023-07-23 04:30:00	9	3.7	329	986.4	986.2	97
7001	2023-07-23 04:40:00	9	3.6	327	986.4	986.2	97
7001	2023-07-23 04:50:00	9	3.6	326	986.5	986.3	97
7001	2023-07-23 05:00:00	9	3.7	331	986.5	986.3	96
7001	2023-07-23 05:10:00	9.4	4.1	340	986.4	986.2	91
7001	2023-07-23 05:20:00	9.5	4.1	337	986.5	986.3	90
7001	2023-07-23 05:30:00	9.3	3.9	329	986.5	986.3	92
7001	2023-07-23 05:40:00	9.3	3.9	329	986.5	986.3	93
7001	2023-07-23 05:50:00	9.3	3.8	335	986.6	986.4	93
7001	2023-07-23 06:00:00	9.3	3.7	339	986.5	986.3	93
7001	2023-07-23 06:10:00	9.3	4.4	345	986.5	986.3	93
7001	2023-07-23 06:20:00	9.4	4.6	344	986.5	986.3	93
7001	2023-07-23 06:30:00	9.4	4.3	344	986.6	986.4	93
7001	2023-07-23 06:40:00	9.5	3.7	345	986.6	986.4	94
7001	2023-07-23 06:50:00	9.4	3.4	345	986.6	986.4	93
7001	2023-07-23 07:00:00	9.5	3.4	343	986.6	986.4	94
7001	2023-07-23 07:10:00	9.6	3.3	338	986.6	986.4	94
7001	2023-07-23 07:20:00	9.7	3.2	334	986.5	986.3	93
7001	2023-07-23 07:30:00	9.8	3.1	335	986.5	986.3	92
7001	2023-07-23 07:40:00	9.8	3	334	986.5	986.3	91
7001	2023-07-23 07:50:00	10	2.9	323	986.6	986.4	90
7001	2023-07-23 08:00:00	10.2	2.8	329	986.6	986.4	90
7001	2023-07-23 08:10:00	10.2	2.8	328	986.5	986.3	88
7001	2023-07-23 08:20:00	10.4	2.8	320	986.5	986.3	87
7001	2023-07-23 08:30:00	10.4	2.5	317	986.5	986.3	86
7001	2023-07-23 08:40:00	10.3	2.6	309	986.5	986.3	87
7001	2023-07-23 08:50:00	10.5	2.4	305	986.6	986.4	85
7001	2023-07-23 09:00:00	10.7	2.4	299	986.5	986.3	84
7001	2023-07-23 09:10:00	10.8	2.2	318	986.5	986.3	83
7001	2023-07-23 09:20:00	11.2	2.6	319	986.6	986.4	81
7001	2023-07-23 09:30:00	11.4	3.1	319	986.6	986.4	79
7001	2023-07-23 09:40:00	11.7	3	320	986.7	986.5	80
7001	2023-07-23 09:50:00	11.4	3.2	297	986.6	986.4	78
7001	2023-07-23 10:00:00	11.8	3.2	309	986.7	986.5	79
7001	2023-07-23 10:10:00	12.1	3	306	986.7	986.5	79
7001	2023-07-23 10:20:00	12.2	3.5	309	986.7	986.5	79
7001	2023-07-23 10:30:00	12	3.4	288	986.7	986.5	77
7001	2023-07-23 10:40:00	12	3.9	303	986.6	986.4	76
7001	2023-07-23 10:50:00	12.4	3.3	292	986.7	986.5	76
7001	2023-07-23 11:00:00	11.8	4.4	318	986.5	986.3	76
7001	2023-07-23 11:10:00	12	4.1	301	986.6	986.4	74
7001	2023-07-23 11:20:00	12	3.9	285	986.5	986.3	73
7001	2023-07-23 11:30:00	12	4.2	296	986.5	986.3	73
7001	2023-07-23 11:40:00	11.9	4	281	986.5	986.3	73
7001	2023-07-23 11:50:00	12.1	3.6	283	986.7	986.5	72
7001	2023-07-23 12:00:00	12.1	3.4	277	986.4	986.2	72
7001	2023-07-23 12:10:00	12.5	3.6	270	986.4	986.2	70
7001	2023-07-23 12:20:00	12.5	3.5	293	986.3	986.1	69
7001	2023-07-23 12:30:00	12.5	4.2	289	986.3	986.1	70
7001	2023-07-23 12:40:00	12.6	3.6	305	986.4	986.2	70
7001	2023-07-23 12:50:00	13.1	2.8	285	986.3	986.1	71
7001	2023-07-23 13:00:00	13.1	3.5	277	986.3	986.1	71
7001	2023-07-23 13:10:00	13.3	3.9	284	986.3	986.1	71
7001	2023-07-23 13:20:00	13	3.1	275	986.2	986	71
7001	2023-07-23 13:30:00	13.5	3.5	276	986.1	985.9	69
7001	2023-07-23 13:40:00	13	3.6	300	986.1	985.9	71
7001	2023-07-23 13:50:00	12.8	3.8	300	986.2	986	74
7001	2023-07-23 14:00:00	12.4	4	311	986	985.8	76
7001	2023-07-23 14:10:00	12.3	3.3	305	986	985.8	79
7001	2023-07-23 14:20:00	12.2	3.9	313	986	985.8	80
7001	2023-07-23 14:30:00	12	4.6	313	986	985.8	82
7001	2023-07-23 14:40:00	12.1	4.3	313	986	985.8	82
7001	2023-07-23 14:50:00	12.1	4.2	314	985.8	985.6	83
7001	2023-07-23 15:00:00	11.7	3.9	317	985.7	985.5	83
7001	2023-07-23 15:10:00	11.9	3.2	327	985.7	985.5	83
7001	2023-07-23 15:20:00	12.3	3.2	313	985.7	985.5	81
7001	2023-07-23 15:30:00	12.2	3.6	325	985.6	985.4	81
7001	2023-07-23 15:40:00	12.5	3.1	316	985.5	985.3	79
7001	2023-07-23 15:50:00	13.2	3.1	287	985.5	985.3	76
7001	2023-07-23 16:00:00	12.7	3.9	317	985.3	985.1	77
7001	2023-07-23 16:10:00	13.3	3	310	985.3	985.1	77
7001	2023-07-23 16:20:00	12.9	3.6	300	985.1	984.9	77
7001	2023-07-23 16:30:00	12.5	4.8	291	985.2	985	78
7001	2023-07-23 16:40:00	12.3	4.2	296	985.2	985	79
7001	2023-07-23 16:50:00	12.3	4	289	985.2	985	79
7001	2023-07-23 17:00:00	12.3	3.6	284	985.1	984.9	79
7001	2023-07-23 17:10:00	12.4	4.4	303	985	984.8	80
7001	2023-07-23 17:20:00	12.7	4.1	295	985	984.8	78
7001	2023-07-23 17:30:00	12.5	4.2	300	984.8	984.6	79
7001	2023-07-23 17:40:00	12.3	4.3	297	984.7	984.5	79
7001	2023-07-23 17:50:00	12.5	4.3	296	984.8	984.6	79
7001	2023-07-23 18:00:00	12.5	3.7	276	984.7	984.5	76
7001	2023-07-23 18:10:00	12.5	4.1	274	984.7	984.5	77
7001	2023-07-23 18:20:00	12.3	4.1	264	984.6	984.4	78
7001	2023-07-23 18:30:00	12.1	3.8	276	984.6	984.4	79
7001	2023-07-23 18:40:00	12	4.3	266	984.5	984.3	77
7001	2023-07-23 18:50:00	12.1	4	278	984.6	984.4	76
7001	2023-07-23 19:00:00	12	3.9	278	984.5	984.3	75
7001	2023-07-23 19:10:00	12	4	266	984.5	984.3	77
7001	2023-07-23 19:20:00	11.8	4	272	984.4	984.2	78
7001	2023-07-23 19:30:00	11.8	4.1	279	984.5	984.3	79
7001	2023-07-23 19:40:00	11.5	4.6	278	984.4	984.2	81
7001	2023-07-23 19:50:00	11.4	4.7	273	984.4	984.2	83
7001	2023-07-23 20:00:00	11	4.5	279	984.3	984.1	86
7001	2023-07-23 20:10:00	11	4.5	279	984.3	984.1	87
7001	2023-07-23 20:20:00	11.1	4.2	280	984.3	984.1	87
7001	2023-07-23 20:30:00	10.9	4	284	984.3	984.1	88
7001	2023-07-23 20:40:00	11	3.6	281	984.2	984	89
7001	2023-07-23 20:50:00	10.9	3.8	284	984.1	983.9	89
7001	2023-07-23 21:00:00	10.8	3.1	282	984	983.8	90
7001	2023-07-23 21:10:00	10.6	2.8	297	983.9	983.7	91
7001	2023-07-23 21:20:00	10.4	2.5	301	983.8	983.6	93
7001	2023-07-23 21:30:00	10.3	2.6	304	983.8	983.6	94
7001	2023-07-23 21:40:00	10.2	2.1	309	983.7	983.5	95
7001	2023-07-23 21:50:00	10.1	2	308	983.7	983.5	96
7001	2023-07-23 22:00:00	10	2.1	310	983.6	983.4	96
7001	2023-07-23 22:10:00	9.9	1.8	308	983.5	983.3	96
7001	2023-07-23 22:20:00	9.8	1.9	305	983.5	983.3	97
7001	2023-07-23 22:30:00	9.8	1.8	302	983.5	983.3	97
7001	2023-07-23 22:40:00	9.7	1.5	305	983.5	983.3	97
7001	2023-07-23 22:50:00	9.7	1.6	307	983.4	983.2	97
7001	2023-07-23 23:00:00	9.6	1.6	304	983.3	983.1	98
7001	2023-07-23 23:10:00	9.6	1.6	295	983.2	983	98
7001	2023-07-23 23:20:00	9.6	1.7	282	983.2	983	98
7001	2023-07-23 23:30:00	9.5	1.5	278	983.1	982.9	98
7001	2023-07-23 23:40:00	9.5	1.3	263	983	982.8	98
7001	2023-07-23 23:50:00	9.5	0.7	245	982.9	982.7	98
7001	2023-07-24	9.4	0.3	229	982.8	982.6	98
7001	2023-07-24 00:10:00	9.2	0	0	982.7	982.5	98
7001	2023-07-24 00:20:00	9.4	0	0	982.8	982.6	99
7001	2023-07-24 00:30:00	9.2	0	0	982.7	982.5	99
7001	2023-07-24 00:40:00	9.2	0	0	982.6	982.4	99
7001	2023-07-24 00:50:00	9.2	0	0	982.6	982.4	99
7001	2023-07-24 01:00:00	9.2	0	0	982.4	982.2	99
7001	2023-07-24 01:10:00	9.3	0	0	982.4	982.2	99
7001	2023-07-24 01:20:00	9.3	0.3	229	982.3	982.1	99
7001	2023-07-24 01:30:00	9.4	0.7	252	982.2	982	99
7001	2023-07-24 01:40:00	9.3	0.5	260	982.1	981.9	99
7001	2023-07-24 01:50:00	9.3	0.6	260	982.1	981.9	99
7001	2023-07-24 02:00:00	9.3	0.9	257	982.1	981.9	98
7001	2023-07-24 02:10:00	9.3	1.1	267	982	981.8	98
7001	2023-07-24 02:20:00	9.3	1.3	277	981.9	981.7	98
7001	2023-07-24 02:30:00	8.9	1.9	283	981.8	981.6	98
7001	2023-07-24 02:40:00	8.7	2	287	981.8	981.6	98
7001	2023-07-24 02:50:00	8.8	1.9	279	981.8	981.6	99
7001	2023-07-24 03:00:00	8.6	1.7	281	981.7	981.5	99
7001	2023-07-24 03:10:00	8.9	1.6	283	981.7	981.5	99
7001	2023-07-24 03:20:00	8.8	1.6	290	981.6	981.4	99
7001	2023-07-24 03:30:00	8.9	1.1	272	981.5	981.3	99
7001	2023-07-24 03:40:00	8.9	0.8	260	981.3	981.1	99
7001	2023-07-24 03:50:00	8.5	0.2	215	981.2	981	98
7001	2023-07-24 04:00:00	8.9	0.5	108	981.2	981	99
7001	2023-07-24 04:10:00	8.9	0.6	49	981.2	981	98
7001	2023-07-24 04:20:00	9.2	0.6	58	981.2	981	97
7001	2023-07-24 04:30:00	9	0	0	981.1	980.9	96
7001	2023-07-24 04:40:00	8.9	0.1	266	981.1	980.9	92
7001	2023-07-24 04:50:00	9.1	0	0	981.1	980.9	91
7001	2023-07-24 05:00:00	9.4	1.3	317	981.2	981	91
7001	2023-07-24 05:10:00	9.2	2.1	321	981.1	980.9	94
7001	2023-07-24 05:20:00	8.9	1.9	310	981.1	980.9	95
7001	2023-07-24 05:30:00	9	1.5	291	981	980.8	95
7001	2023-07-24 05:40:00	9.2	1.6	268	981	980.8	91
7001	2023-07-24 05:50:00	9.5	1.2	261	981	980.8	91
7001	2023-07-24 06:00:00	9.6	1.1	259	981	980.8	91
7001	2023-07-24 06:10:00	9.8	0.5	277	981.1	980.9	91
7001	2023-07-24 06:20:00	9.9	0.1	293	981.1	980.9	92
7001	2023-07-24 06:30:00	9.7	0.4	359	980.7	980.5	91
7001	2023-07-24 06:40:00	9.5	0.2	10	980.7	980.5	92
7001	2023-07-24 06:50:00	9.4	0.7	0	980.8	980.6	94
7001	2023-07-24 07:00:00	9.6	1.7	282	980.7	980.5	92
7001	2023-07-24 07:10:00	9.6	2	281	980.7	980.5	92
7001	2023-07-24 07:20:00	9.8	1.5	286	980.7	980.5	92
7001	2023-07-24 07:30:00	9.9	1	298	980.5	980.3	92
7001	2023-07-24 07:40:00	10	1.1	286	980.6	980.4	91
7001	2023-07-24 07:50:00	10	1.3	284	980.5	980.3	91
7001	2023-07-24 08:00:00	9.8	1.5	294	980.4	980.2	92
7001	2023-07-24 08:10:00	9.7	1.8	290	980.5	980.3	92
7001	2023-07-24 08:20:00	9.8	1.2	290	980.5	980.3	92
7001	2023-07-24 08:30:00	9.9	1.2	288	980.5	980.3	90
7001	2023-07-24 08:40:00	9.8	1.3	304	980.5	980.3	92
7001	2023-07-24 08:50:00	10.1	1.3	301	980.5	980.3	94
7001	2023-07-24 09:00:00	10.3	1.6	284	980.6	980.4	93
7001	2023-07-24 09:10:00	10.7	1.9	284	980.4	980.2	91
7001	2023-07-24 09:20:00	11	1.8	300	980.4	980.2	90
7001	2023-07-24 09:30:00	11.5	2.7	275	980.3	980.1	85
7001	2023-07-24 09:40:00	11.6	2.4	258	980.8	980.6	84
7001	2023-07-24 09:50:00	12.4	1.9	229	980.4	980.2	80
7001	2023-07-24 10:00:00	12.4	2.6	233	980.5	980.3	77
7001	2023-07-24 10:10:00	12.1	2.3	268	980.3	980.1	78
7001	2023-07-24 10:20:00	13	2	226	980.6	980.4	78
7001	2023-07-24 10:30:00	13.8	3.5	195	980.4	980.2	76
7001	2023-07-24 10:40:00	13.6	4.3	190	980.2	980	73
7001	2023-07-24 10:50:00	13.7	4.8	203	980.2	980	75
7001	2023-07-24 11:00:00	12.6	5.1	199	980	979.8	77
7001	2023-07-24 11:10:00	12.3	4.5	212	980.2	980	81
7001	2023-07-24 11:20:00	12.5	4.1	208	980.1	979.9	80
7001	2023-07-24 11:30:00	12.7	3.6	208	980.3	980.1	81
7001	2023-07-24 11:40:00	12.6	4.4	204	980	979.8	81
7001	2023-07-24 11:50:00	12.6	4.8	204	980.1	979.9	82
7001	2023-07-24 12:00:00	12.3	4.9	202	980	979.8	82
7001	2023-07-24 12:10:00	12.4	4.5	205	980.1	979.9	81
7001	2023-07-24 12:20:00	12.8	4.6	202	980.1	979.9	82
7001	2023-07-24 12:30:00	12.9	5.1	198	980	979.8	81
7001	2023-07-24 12:40:00	12.7	4.9	206	980	979.8	82
7001	2023-07-24 12:50:00	12.8	5.4	207	979.9	979.7	82
7001	2023-07-24 13:00:00	12.4	5.7	201	979.8	979.6	83
7001	2023-07-24 13:10:00	12.8	5.8	194	979.8	979.6	82
7001	2023-07-24 13:20:00	13.3	5.9	180	979.8	979.6	80
7001	2023-07-24 13:30:00	13	6.1	183	979.8	979.6	80
7001	2023-07-24 13:40:00	13.2	6	194	979.7	979.5	80
7001	2023-07-24 13:50:00	13.2	6.2	194	979.6	979.4	81
7001	2023-07-24 14:00:00	12.7	6.7	203	979.6	979.4	83
7001	2023-07-24 14:10:00	12.4	6.5	206	979.5	979.3	84
7001	2023-07-24 14:20:00	12.6	6.4	201	979.6	979.4	83
7001	2023-07-24 14:30:00	12.5	6.4	202	979.5	979.3	84
7001	2023-07-24 14:40:00	12.6	6.9	203	979.4	979.2	83
7001	2023-07-24 14:50:00	12.6	6.4	201	979.4	979.2	84
7001	2023-07-24 15:00:00	12.4	6.4	204	979.3	979.1	84
7001	2023-07-24 15:10:00	12.8	6.6	192	979.2	979	83
7001	2023-07-24 15:20:00	13	6.7	196	979.2	979	82
7001	2023-07-24 15:30:00	12.9	6.7	204	979.1	978.9	81
7001	2023-07-24 15:40:00	12.5	6.3	206	979.1	978.9	84
7001	2023-07-24 15:50:00	12.6	6.4	198	979	978.8	83
7001	2023-07-24 16:00:00	12.6	6.2	199	979.1	978.9	83
7001	2023-07-24 16:10:00	12.6	6.4	205	979	978.8	83
7001	2023-07-24 16:20:00	12.4	5.7	212	979	978.8	86
7001	2023-07-24 16:30:00	12.2	5.5	210	979	978.8	86
7001	2023-07-24 16:40:00	11.9	5.3	212	979.1	978.9	87
7001	2023-07-24 16:50:00	12.7	5	209	979.1	978.9	85
7001	2023-07-24 17:00:00	12.5	4.8	216	979	978.8	86
7001	2023-07-24 17:10:00	11.6	4.7	223	978.9	978.7	88
7001	2023-07-24 17:20:00	12	4.5	221	979	978.8	86
7001	2023-07-24 17:30:00	11.6	4.1	263	978.9	978.7	91
7001	2023-07-24 17:40:00	10.9	3.5	272	978.9	978.7	94
7001	2023-07-24 17:50:00	10.8	3.5	284	979	978.8	95
7001	2023-07-24 18:00:00	10.9	3.7	288	979	978.8	95
7001	2023-07-24 18:10:00	10.8	3.8	276	979.1	978.9	95
7001	2023-07-24 18:20:00	10.3	4.5	278	979	978.8	95
7001	2023-07-24 18:30:00	10.4	3.3	279	978.9	978.7	95
7001	2023-07-24 18:40:00	10.3	3.3	274	978.9	978.7	95
7001	2023-07-24 18:50:00	10	3.8	280	978.9	978.7	95
7001	2023-07-24 19:00:00	10.3	3.5	278	979.1	978.9	95
7001	2023-07-24 19:10:00	10.3	3.8	268	979.2	979	94
7001	2023-07-24 19:20:00	10.3	3.9	278	979.1	978.9	93
7001	2023-07-24 19:30:00	10.4	3.6	274	979.1	978.9	93
7001	2023-07-24 19:40:00	10.1	3.4	270	979.1	978.9	91
7001	2023-07-24 19:50:00	10.1	3.9	291	979.1	978.9	89
7001	2023-07-24 20:00:00	10	4.2	298	979.1	978.9	89
7001	2023-07-24 20:10:00	9.8	3.8	287	979.1	978.9	89
7001	2023-07-24 20:20:00	9.7	3.6	300	979.1	978.9	90
7001	2023-07-24 20:30:00	9.7	3.6	296	979.1	978.9	89
7001	2023-07-24 20:40:00	9.6	3.3	278	979.1	978.9	89
7001	2023-07-24 20:50:00	9.5	3.2	269	979	978.8	90
7001	2023-07-24 21:00:00	9.4	3.1	281	978.9	978.7	92
7001	2023-07-24 21:10:00	9.3	3.1	276	978.9	978.7	93
7001	2023-07-24 21:20:00	9.3	3	286	978.9	978.7	92
7001	2023-07-24 21:30:00	9.2	2.8	289	978.9	978.7	93
7001	2023-07-24 21:40:00	9.2	3.3	277	978.9	978.7	92
7001	2023-07-24 21:50:00	9.2	3.2	275	978.8	978.6	92
7001	2023-07-24 22:00:00	9.2	2.7	284	978.7	978.5	91
7001	2023-07-24 22:10:00	9.2	2.6	273	978.6	978.4	89
7001	2023-07-24 22:20:00	9.1	3.3	256	978.6	978.4	90
7001	2023-07-24 22:30:00	9.1	3	272	978.7	978.5	90
7001	2023-07-24 22:40:00	9	2.4	273	978.6	978.4	90
7001	2023-07-24 22:50:00	9.1	2.8	262	978.6	978.4	90
7001	2023-07-24 23:00:00	9.1	2.8	260	978.6	978.4	89
7001	2023-07-24 23:10:00	9	3.1	260	978.5	978.3	89
7001	2023-07-24 23:20:00	9	3.1	271	978.6	978.4	89
7001	2023-07-24 23:30:00	9	2.9	276	978.6	978.4	89
7001	2023-07-24 23:40:00	9	2.9	279	978.6	978.4	89
7001	2023-07-24 23:50:00	8.9	2.9	275	978.6	978.4	89
7001	2023-07-25	8.9	2.3	287	978.5	978.3	90
7001	2023-07-25 00:10:00	8.9	1.9	291	978.5	978.3	90
7001	2023-07-25 00:20:00	8.9	1.9	286	978.5	978.3	90
7001	2023-07-25 00:30:00	8.8	2.2	281	978.5	978.3	91
7001	2023-07-25 00:40:00	8.7	2.3	292	978.4	978.2	91
7001	2023-07-25 00:50:00	8.7	2.6	287	978.4	978.2	92
7001	2023-07-25 01:00:00	8.6	2.5	285	978.4	978.2	92
7001	2023-07-25 01:10:00	8.5	2.1	299	978.4	978.2	92
7001	2023-07-25 01:20:00	8.5	1.9	285	978.4	978.2	91
7001	2023-07-25 01:30:00	8.4	1.9	273	978.3	978.1	91
7001	2023-07-25 01:40:00	8.4	1.7	253	978.3	978.1	92
7001	2023-07-25 01:50:00	8.4	1.7	253	978.2	978	92
7001	2023-07-25 02:00:00	8.3	1.6	271	978.2	978	92
7001	2023-07-25 02:10:00	8.3	1.5	272	978.1	977.9	92
7001	2023-07-25 02:20:00	8.3	1.9	267	978.1	977.9	92
7001	2023-07-25 02:30:00	8.2	2	275	978	977.8	92
7001	2023-07-25 02:40:00	8.2	2.2	263	978	977.8	92
7001	2023-07-25 02:50:00	8.2	2.3	266	978	977.8	92
7001	2023-07-25 03:00:00	8.2	1.7	275	977.9	977.7	92
7001	2023-07-25 03:10:00	8.1	1.8	293	978	977.8	93
7001	2023-07-25 03:20:00	8.1	1.9	308	977.9	977.7	93
7001	2023-07-25 03:30:00	8.1	2.2	298	977.8	977.6	93
7001	2023-07-25 03:40:00	8	2.2	287	977.9	977.7	93
7001	2023-07-25 03:50:00	8.1	1.8	307	977.9	977.7	93
7001	2023-07-25 04:00:00	8	2.6	318	977.8	977.6	95
7001	2023-07-25 04:10:00	7.9	2.6	324	977.8	977.6	97
7001	2023-07-25 04:20:00	7.9	2.3	317	977.8	977.6	98
7001	2023-07-25 04:30:00	7.8	2.3	317	977.7	977.5	98
7001	2023-07-25 04:40:00	7.7	2.4	316	977.6	977.4	98
7001	2023-07-25 04:50:00	7.7	2.3	315	977.6	977.4	98
7001	2023-07-25 05:00:00	7.5	2.4	315	977.5	977.3	98
7001	2023-07-25 05:10:00	7.5	2.3	303	977.6	977.4	99
7001	2023-07-25 05:20:00	7.5	2.3	319	977.6	977.4	99
7001	2023-07-25 05:30:00	7.6	2.1	317	977.6	977.4	99
7001	2023-07-25 05:40:00	7.6	1.9	335	977.5	977.3	99
7001	2023-07-25 05:50:00	7.5	1.9	339	977.5	977.3	99
7001	2023-07-25 06:00:00	7.6	1.5	336	977.4	977.2	99
7001	2023-07-25 06:10:00	7.5	1.4	335	977.4	977.2	99
7001	2023-07-25 06:20:00	7.6	1.2	351	977.4	977.2	99
7001	2023-07-25 06:30:00	7.8	1.3	7	977.3	977.1	99
7001	2023-07-25 06:40:00	7.8	2.2	23	977.4	977.2	99
7001	2023-07-25 06:50:00	7.8	2.6	32	977.3	977.1	98
7001	2023-07-25 07:00:00	8	3	34	977.4	977.2	98
7001	2023-07-25 07:10:00	8.1	2.7	37	977.4	977.2	98
7001	2023-07-25 07:20:00	8.1	2.6	41	977.4	977.2	98
7001	2023-07-25 07:30:00	8.1	2.7	37	977.4	977.2	97
7001	2023-07-25 07:40:00	8.1	2.4	55	977.4	977.2	96
7001	2023-07-25 07:50:00	8.3	1.5	75	977.3	977.1	95
7001	2023-07-25 08:00:00	8.5	1.7	151	977.3	977.1	94
7001	2023-07-25 08:10:00	8.7	2.1	160	977.3	977.1	92
7001	2023-07-25 08:20:00	8.9	2.8	172	977.2	977	90
7001	2023-07-25 08:30:00	9	2.9	180	977.3	977.1	89
7001	2023-07-25 08:40:00	9.1	2.8	175	977.3	977.1	88
7001	2023-07-25 08:50:00	9.3	3.3	184	977.3	977.1	88
7001	2023-07-25 09:00:00	9.4	3.9	184	977.2	977	86
7001	2023-07-25 09:10:00	9.6	4	183	977.2	977	86
7001	2023-07-25 09:20:00	9.7	4.2	182	977.1	976.9	86
7001	2023-07-25 09:30:00	9.5	4.8	184	977.1	976.9	86
7001	2023-07-25 09:40:00	9.9	4.8	184	977	976.8	85
7001	2023-07-25 09:50:00	9.8	5.9	188	976.9	976.7	85
7001	2023-07-25 10:00:00	10.2	5.3	183	977	976.8	85
7001	2023-07-25 10:10:00	10	5.9	186	976.9	976.7	84
7001	2023-07-25 10:20:00	10.3	6.2	182	977	976.8	84
7001	2023-07-25 10:30:00	10.2	5.8	178	977	976.8	83
7001	2023-07-25 10:40:00	10.1	5.7	186	976.9	976.7	84
7001	2023-07-25 10:50:00	10.3	6	188	976.9	976.7	84
7001	2023-07-25 11:00:00	10.5	6.1	182	976.8	976.6	83
7001	2023-07-25 11:10:00	10.5	5.9	183	976.9	976.7	84
7001	2023-07-25 11:20:00	10.7	5.2	168	976.9	976.7	83
7001	2023-07-25 11:30:00	10.6	6	169	976.8	976.6	84
7001	2023-07-25 11:40:00	10.5	5.7	161	976.7	976.5	83
7001	2023-07-25 11:50:00	10.8	6	167	976.7	976.5	83
7001	2023-07-25 12:00:00	11.7	5.8	161	976.7	976.5	80
7001	2023-07-25 12:10:00	11.4	5.7	158	976.6	976.4	80
7001	2023-07-25 12:20:00	11.3	5.7	145	976.8	976.6	80
7001	2023-07-25 12:30:00	11.4	5.4	134	976.6	976.4	80
7001	2023-07-25 12:40:00	11.1	5.2	141	976.7	976.5	82
7001	2023-07-25 12:50:00	11	5.5	134	976.7	976.5	84
7001	2023-07-25 13:00:00	10.7	5.8	129	976.6	976.4	86
7001	2023-07-25 13:10:00	10.9	5.9	144	976.6	976.4	88
7001	2023-07-25 13:20:00	10.8	6.6	140	976.6	976.4	87
7001	2023-07-25 13:30:00	11	6.1	142	976.6	976.4	86
7001	2023-07-25 13:40:00	11	5.8	138	976.7	976.5	86
7001	2023-07-25 13:50:00	11.2	6.1	142	976.7	976.5	85
7001	2023-07-25 14:00:00	11.4	6.4	151	976.6	976.4	83
7001	2023-07-25 14:10:00	11.5	6.5	145	976.6	976.4	82
7001	2023-07-25 14:20:00	11.5	5.6	143	976.6	976.4	81
7001	2023-07-25 14:30:00	11.4	5.4	141	976.7	976.5	82
7001	2023-07-25 14:40:00	11.5	6.1	156	976.6	976.4	83
7001	2023-07-25 14:50:00	11.2	5.7	143	976.6	976.4	82
7001	2023-07-25 15:00:00	10.9	5.6	137	976.8	976.6	85
7001	2023-07-25 15:10:00	11	5	152	976.6	976.4	85
7001	2023-07-25 15:20:00	11.3	6.2	164	976.6	976.4	85
7001	2023-07-25 15:30:00	11.3	6.1	157	976.6	976.4	83
7001	2023-07-25 15:40:00	11.5	5.4	153	976.6	976.4	81
7001	2023-07-25 15:50:00	11.3	5.6	170	976.5	976.3	81
7001	2023-07-25 16:00:00	11.8	6	179	976.9	976.7	80
7001	2023-07-25 16:10:00	12.2	6.2	174	976.6	976.4	77
7001	2023-07-25 16:20:00	11.7	6.3	178	976.5	976.3	75
7001	2023-07-25 16:30:00	12.4	5.9	174	976.5	976.3	75
7001	2023-07-25 16:40:00	12	6	171	976.4	976.2	75
7001	2023-07-25 16:50:00	12.4	6.1	175	976.6	976.4	74
7001	2023-07-25 17:00:00	12.4	6.5	174	976.6	976.4	76
7001	2023-07-25 17:10:00	12.7	6.3	181	976.4	976.2	75
7001	2023-07-25 17:20:00	12.6	6.6	179	976.4	976.2	75
7001	2023-07-25 17:30:00	11.9	7	172	976.4	976.2	79
7001	2023-07-25 17:40:00	12.4	7.4	176	976.4	976.2	75
7001	2023-07-25 17:50:00	12.3	7.9	183	976.2	976	75
7001	2023-07-25 18:00:00	12.2	7.8	178	976.5	976.3	77
7001	2023-07-25 18:10:00	12.5	7.8	174	976.4	976.2	74
7001	2023-07-25 18:20:00	12.6	7.4	177	976.3	976.1	72
7001	2023-07-25 18:30:00	12.5	7.3	178	976.1	975.9	74
7001	2023-07-25 18:40:00	12.8	6.7	176	976.2	976	73
7001	2023-07-25 18:50:00	12.7	6.7	176	976.5	976.3	72
7001	2023-07-25 19:00:00	13.2	6.8	167	976.3	976.1	71
7001	2023-07-25 19:10:00	12.6	6.2	156	976.2	976	74
7001	2023-07-25 19:20:00	11.7	6.4	138	976.1	975.9	78
7001	2023-07-25 19:30:00	11.5	7.1	146	976	975.8	78
7001	2023-07-25 19:40:00	11.4	7	151	976	975.8	77
7001	2023-07-25 19:50:00	11.5	6.7	143	976.2	976	76
7001	2023-07-25 20:00:00	11.8	6.4	147	976.2	976	76
7001	2023-07-25 20:10:00	11.7	7.1	146	976.2	976	76
7001	2023-07-25 20:20:00	11.5	6.3	136	976.3	976.1	76
7001	2023-07-25 20:30:00	11.6	5.7	138	976.3	976.1	77
7001	2023-07-25 20:40:00	11.3	6.2	140	976.2	976	79
7001	2023-07-25 20:50:00	11.2	6.3	141	976.1	975.9	80
7001	2023-07-25 21:00:00	11.3	6.4	137	976.1	975.9	81
7001	2023-07-25 21:10:00	11.3	6	142	976.2	976	81
7001	2023-07-25 21:20:00	11	6.5	138	976.1	975.9	83
7001	2023-07-25 21:30:00	11.1	6.4	145	976.1	975.9	82
7001	2023-07-25 21:40:00	11	7.2	142	976.1	975.9	83
7001	2023-07-25 21:50:00	10.9	7.4	139	976	975.8	84
7001	2023-07-25 22:00:00	10.9	7.3	140	976	975.8	86
7001	2023-07-25 22:10:00	11	7	134	975.9	975.7	86
7001	2023-07-25 22:20:00	10.8	7.8	132	976	975.8	87
7001	2023-07-25 22:30:00	11	7.4	138	975.8	975.6	89
7001	2023-07-25 22:40:00	10.9	8.2	136	976	975.8	90
7001	2023-07-25 22:50:00	10.8	9.5	143	975.6	975.4	92
7001	2023-07-25 23:00:00	10.7	10	138	975.8	975.6	92
7001	2023-07-25 23:10:00	10.7	10	140	975.9	975.7	92
7001	2023-07-25 23:20:00	10.5	10.4	144	975.8	975.6	90
7001	2023-07-25 23:30:00	10.6	9.5	139	975.8	975.6	90
7001	2023-07-25 23:40:00	10.7	9.3	140	975.9	975.7	91
7001	2023-07-25 23:50:00	10.6	8.9	140	976	975.8	90
7001	2023-07-26	10.6	9.2	131	975.8	975.6	91
7001	2023-07-26 00:10:00	10.5	8.5	136	975.7	975.5	91
7001	2023-07-26 00:20:00	10.6	9.4	136	975.6	975.4	91
7001	2023-07-26 00:30:00	10.6	9.2	141	975.8	975.6	92
7001	2023-07-26 00:40:00	10.5	9.2	138	975.8	975.6	91
7001	2023-07-26 00:50:00	10.4	9.4	135	975.9	975.7	91
7001	2023-07-26 01:00:00	10.3	9.1	136	975.9	975.7	91
7001	2023-07-26 01:10:00	10.5	9	138	975.9	975.7	90
7001	2023-07-26 01:20:00	10.5	9.1	135	975.8	975.6	90
7001	2023-07-26 01:30:00	10.4	8.6	134	975.7	975.5	90
7001	2023-07-26 01:40:00	10.4	9.5	133	975.7	975.5	91
7001	2023-07-26 01:50:00	10.4	8.7	133	975.7	975.5	91
7001	2023-07-26 02:00:00	10.5	8.5	135	975.9	975.7	88
7001	2023-07-26 02:10:00	10.4	7.6	121	975.8	975.6	90
7001	2023-07-26 02:20:00	10.4	8.1	123	975.7	975.5	89
7001	2023-07-26 02:30:00	10.4	8.8	119	975.6	975.4	90
7001	2023-07-26 02:40:00	10.3	9	119	975.6	975.4	90
7001	2023-07-26 02:50:00	10.4	9.7	121	975.4	975.2	90
7001	2023-07-26 03:00:00	10.1	9.2	124	975.3	975.1	91
7001	2023-07-26 03:10:00	10.2	9.5	122	975.3	975.1	92
7001	2023-07-26 03:20:00	10.3	9.4	131	975.4	975.2	91
7001	2023-07-26 03:30:00	10.2	10.3	128	975.3	975.1	91
7001	2023-07-26 03:40:00	10.2	9.6	125	975.3	975.1	92
7001	2023-07-26 03:50:00	10.2	10.6	117	975.2	975	92
7001	2023-07-26 04:00:00	10.2	10.1	118	975.3	975.1	91
7001	2023-07-26 04:10:00	10.1	10.5	120	975.2	975	91
7001	2023-07-26 04:20:00	10.1	10.7	118	975.1	974.9	91
7001	2023-07-26 04:30:00	10.1	10.4	124	975.1	974.9	91
7001	2023-07-26 04:40:00	10.1	10.2	125	975	974.8	89
7001	2023-07-26 04:50:00	10.2	8.7	123	975.2	975	88
7001	2023-07-26 05:00:00	10.2	9.3	125	975.2	975	88
7001	2023-07-26 05:10:00	10.4	9.3	125	975.2	975	87
7001	2023-07-26 05:20:00	10.5	11.1	122	975	974.8	85
7001	2023-07-26 05:30:00	10.8	10.8	119	975.1	974.9	83
7001	2023-07-26 05:40:00	10.9	8.2	103	975.1	974.9	83
7001	2023-07-26 05:50:00	10.9	8.9	93	975.1	974.9	82
7001	2023-07-26 06:00:00	11.1	8.7	106	975.1	974.9	81
7001	2023-07-26 06:10:00	10.8	9.1	96	975	974.8	82
7001	2023-07-26 06:20:00	10.7	10.1	91	974.7	974.5	82
7001	2023-07-26 06:30:00	11.1	10.2	91	975	974.8	81
7001	2023-07-26 06:40:00	11	9.5	90	974.9	974.7	80
7001	2023-07-26 06:50:00	11.1	10.3	83	974.9	974.7	79
7001	2023-07-26 07:00:00	11.5	9.7	106	975	974.8	77
7001	2023-07-26 07:10:00	11.4	9.1	125	975.2	975	77
7001	2023-07-26 07:20:00	11.3	8.8	123	975.1	974.9	77
7001	2023-07-26 07:30:00	11.4	7.7	113	975.3	975.1	77
7001	2023-07-26 07:40:00	11.2	9	128	975.2	975	79
7001	2023-07-26 07:50:00	11.1	9.4	126	975.4	975.2	81
7001	2023-07-26 08:00:00	10.9	8.4	130	975.5	975.3	85
7001	2023-07-26 08:10:00	10.8	8.8	131	975.5	975.3	86
7001	2023-07-26 08:20:00	10.6	8.7	124	975.5	975.3	84
7001	2023-07-26 08:30:00	10.8	8.1	118	975.7	975.5	83
7001	2023-07-26 08:40:00	10.9	6.9	114	975.8	975.6	81
7001	2023-07-26 08:50:00	10.9	6.7	97	975.7	975.5	79
7001	2023-07-26 09:00:00	10.7	8.8	79	975.5	975.3	78
7001	2023-07-26 09:10:00	11	8	71	975.6	975.4	78
7001	2023-07-26 09:20:00	11.1	7.1	70	975.6	975.4	78
7001	2023-07-26 09:30:00	11.3	6.8	70	975.7	975.5	78
7001	2023-07-26 09:40:00	11.4	6.6	74	975.4	975.2	78
7001	2023-07-26 09:50:00	11.7	7	79	975.3	975.1	76
7001	2023-07-26 10:00:00	11.9	7.2	81	975.4	975.2	75
7001	2023-07-26 10:10:00	11.9	7.3	82	975.3	975.1	73
7001	2023-07-26 10:20:00	12.6	7	89	975.3	975.1	72
7001	2023-07-26 10:30:00	12.7	7.9	111	975.2	975	71
7001	2023-07-26 10:40:00	12.2	10	125	975	974.8	71
7001	2023-07-26 10:50:00	12.2	9.5	131	974.9	974.7	74
7001	2023-07-26 11:00:00	12.1	8.8	141	975.2	975	76
7001	2023-07-26 11:10:00	12.1	8.9	138	975.1	974.9	74
7001	2023-07-26 11:20:00	12.4	8.5	145	975.3	975.1	75
7001	2023-07-26 11:30:00	12.5	8.1	147	974.9	974.7	74
7001	2023-07-26 11:40:00	12.9	7.4	141	975.3	975.1	75
7001	2023-07-26 11:50:00	13	6.4	128	975.4	975.2	74
7001	2023-07-26 12:00:00	12.5	6.4	126	975	974.8	76
7001	2023-07-26 12:10:00	12.9	6.8	134	975.3	975.1	76
7001	2023-07-26 12:20:00	13.1	6.3	131	975	974.8	75
7001	2023-07-26 12:30:00	12.7	7	136	975	974.8	77
7001	2023-07-26 12:40:00	12.5	8.1	146	974.8	974.6	79
7001	2023-07-26 12:50:00	12.1	8.3	142	975.2	975	79
7001	2023-07-26 13:00:00	12.4	8.3	141	975.2	975	78
7001	2023-07-26 13:10:00	12.8	8.4	145	975.1	974.9	76
7001	2023-07-26 13:20:00	12.9	8.9	150	974.7	974.5	77
7001	2023-07-26 13:30:00	13	9.4	149	974.8	974.6	74
7001	2023-07-26 13:40:00	12.8	9.6	149	974.7	974.5	75
7001	2023-07-26 13:50:00	13.2	9.3	151	974.6	974.4	75
7001	2023-07-26 14:00:00	12.4	10.1	148	974.7	974.5	77
7001	2023-07-26 14:10:00	13.4	8.9	155	974.9	974.7	74
7001	2023-07-26 14:20:00	13.4	9.9	150	974.4	974.2	73
7001	2023-07-26 14:30:00	13	9.7	149	974.3	974.1	75
7001	2023-07-26 14:40:00	12.9	10.6	150	974.4	974.2	75
7001	2023-07-26 14:50:00	12.7	10.5	154	974.5	974.3	77
7001	2023-07-26 15:00:00	12.7	9.7	150	974.6	974.4	76
7001	2023-07-26 15:10:00	12.9	8.9	148	974.4	974.2	75
7001	2023-07-26 15:20:00	13.5	9	152	974.5	974.3	74
7001	2023-07-26 15:30:00	13.1	8.2	146	974.2	974	73
7001	2023-07-26 15:40:00	12.7	7.4	141	974.3	974.1	74
7001	2023-07-26 15:50:00	12.5	6.6	146	974.2	974	75
7001	2023-07-26 16:00:00	12.4	6.6	149	974.5	974.3	75
7001	2023-07-26 16:10:00	12.4	6.1	144	974.6	974.4	75
7001	2023-07-26 16:20:00	12.9	7.6	149	974.4	974.2	70
7001	2023-07-26 16:30:00	12.3	7	141	974.5	974.3	72
7001	2023-07-26 16:40:00	12.7	6.8	140	974.8	974.6	71
7001	2023-07-26 16:50:00	12.6	6.7	141	974.6	974.4	72
7001	2023-07-26 17:00:00	12.7	7.4	148	974.3	974.1	72
7001	2023-07-26 17:10:00	12.5	7.1	141	974.3	974.1	73
7001	2023-07-26 17:20:00	12.5	6.4	139	974.5	974.3	73
7001	2023-07-26 17:30:00	12.5	5.3	136	974.3	974.1	74
7001	2023-07-26 17:40:00	12.6	5.8	133	974.4	974.2	73
7001	2023-07-26 17:50:00	12.5	6.7	136	974.3	974.1	74
7001	2023-07-26 18:00:00	12.5	6.6	141	974.3	974.1	75
7001	2023-07-26 18:10:00	11.8	7.6	130	974	973.8	76
7001	2023-07-26 18:20:00	11.7	8.4	132	974.1	973.9	77
7001	2023-07-26 18:30:00	11.5	8.4	143	974	973.8	76
7001	2023-07-26 18:40:00	11.5	7.4	146	974	973.8	77
7001	2023-07-26 18:50:00	11.5	7.4	138	974.1	973.9	75
7001	2023-07-26 19:00:00	11.2	7	140	974.2	974	76
7001	2023-07-26 19:10:00	11.3	6.1	137	974.2	974	77
7001	2023-07-26 19:20:00	11.2	6.2	122	974.2	974	76
7001	2023-07-26 19:30:00	11.1	6.3	127	974.2	974	77
7001	2023-07-26 19:40:00	11.1	5.1	127	974.3	974.1	77
7001	2023-07-26 19:50:00	11.2	4.8	128	974.3	974.1	78
7001	2023-07-26 20:00:00	10.9	4.7	118	974.2	974	79
7001	2023-07-26 20:10:00	10.8	5.4	103	974.2	974	78
7001	2023-07-26 20:20:00	10.6	5.6	112	974.2	974	79
7001	2023-07-26 20:30:00	10.6	4.5	125	974.1	973.9	79
7001	2023-07-26 20:40:00	10.6	4.8	129	974.1	973.9	80
7001	2023-07-26 20:50:00	10.6	4.3	122	974.1	973.9	79
7001	2023-07-26 21:00:00	10.5	4.3	129	974.1	973.9	80
7001	2023-07-26 21:10:00	10.6	4	126	974.2	974	80
7001	2023-07-26 21:20:00	10.4	4.4	114	974.1	973.9	81
7001	2023-07-26 21:30:00	10.4	3.8	122	974	973.8	81
7001	2023-07-26 21:40:00	10.2	4	129	974	973.8	81
7001	2023-07-26 21:50:00	10	3.8	134	973.8	973.6	82
7001	2023-07-26 22:00:00	10	3.3	127	973.9	973.7	83
7001	2023-07-26 22:10:00	10	2.7	119	973.9	973.7	83
7001	2023-07-26 22:20:00	9.3	2.8	78	973.8	973.6	85
7001	2023-07-26 22:30:00	9.3	3.2	72	973.8	973.6	86
7001	2023-07-26 22:40:00	9.2	2.9	61	973.7	973.5	86
7001	2023-07-26 22:50:00	9.3	2.8	46	973.7	973.5	86
7001	2023-07-26 23:00:00	9.2	2.7	50	973.8	973.6	86
7001	2023-07-26 23:10:00	8.9	3	51	973.8	973.6	87
7001	2023-07-26 23:20:00	8.8	3.5	53	973.7	973.5	88
7001	2023-07-26 23:30:00	8.5	3	33	973.6	973.4	88
7001	2023-07-26 23:40:00	8.5	2.5	35	973.6	973.4	89
7001	2023-07-26 23:50:00	8.6	1.9	30	973.6	973.4	89
7001	2023-07-27	9	2.8	20	973.5	973.3	88
7001	2023-07-27 00:10:00	8.7	3.6	23	973.4	973.2	89
7001	2023-07-27 00:20:00	8.4	4.1	28	973.4	973.2	89
7001	2023-07-27 00:30:00	8.6	4.1	31	973.4	973.2	91
7001	2023-07-27 00:40:00	8.7	4.3	37	973.4	973.2	90
7001	2023-07-27 00:50:00	8.7	4.2	41	973.4	973.2	89
7001	2023-07-27 01:00:00	8.8	4	42	973.3	973.1	87
7001	2023-07-27 01:10:00	8.7	4.2	37	973.4	973.2	85
7001	2023-07-27 01:20:00	8.9	4.6	48	973.3	973.1	82
7001	2023-07-27 01:30:00	8.7	5.2	56	973.3	973.1	82
7001	2023-07-27 01:40:00	8.7	5.1	51	973.3	973.1	85
7001	2023-07-27 01:50:00	8.3	5.4	52	973.1	972.9	84
7001	2023-07-27 02:00:00	8.1	5.6	61	973.1	972.9	84
7001	2023-07-27 02:10:00	8.3	5.7	66	973	972.8	82
7001	2023-07-27 02:20:00	8.2	5.4	63	973.1	972.9	82
7001	2023-07-27 02:30:00	8.6	5.8	72	973.1	972.9	80
7001	2023-07-27 02:40:00	7.4	5.4	62	972.9	972.7	83
7001	2023-07-27 02:50:00	6.6	5	33	972.9	972.7	88
7001	2023-07-27 03:00:00	6.2	4.6	34	972.8	972.6	90
7001	2023-07-27 03:10:00	6.1	4.9	39	972.9	972.7	90
7001	2023-07-27 03:20:00	6.2	5.3	41	972.8	972.6	89
7001	2023-07-27 03:30:00	6.3	5.6	52	972.8	972.6	88
7001	2023-07-27 03:40:00	6.4	5.4	56	972.8	972.6	88
7001	2023-07-27 03:50:00	6.3	5	57	972.8	972.6	89
7001	2023-07-27 04:00:00	6.5	5.1	53	972.8	972.6	88
7001	2023-07-27 04:10:00	6.7	5.3	58	972.8	972.6	86
7001	2023-07-27 04:20:00	6.8	5.9	58	972.7	972.5	84
7001	2023-07-27 04:30:00	6.5	5.9	61	972.7	972.5	85
7001	2023-07-27 04:40:00	6.9	6.2	63	972.8	972.6	85
7001	2023-07-27 04:50:00	6.9	5.8	59	972.9	972.7	84
7001	2023-07-27 05:00:00	6.9	5.4	62	972.8	972.6	83
7001	2023-07-27 05:10:00	6.8	5.7	57	972.8	972.6	83
7001	2023-07-27 05:20:00	7	5.3	61	972.9	972.7	83
7001	2023-07-27 05:30:00	7	5.4	59	972.9	972.7	82
7001	2023-07-27 05:40:00	7.3	5.5	57	973	972.8	81
7001	2023-07-27 05:50:00	7.2	5.3	62	972.9	972.7	81
7001	2023-07-27 06:00:00	7.5	5.8	59	972.7	972.5	79
7001	2023-07-27 06:10:00	7.6	6.4	58	972.8	972.6	79
7001	2023-07-27 06:20:00	7.8	6	61	972.8	972.6	78
7001	2023-07-27 06:30:00	7.9	6.6	64	972.8	972.6	77
7001	2023-07-27 06:40:00	7.9	5.4	63	972.9	972.7	77
7001	2023-07-27 06:50:00	7.8	4.8	54	972.9	972.7	78
7001	2023-07-27 07:00:00	7.7	4.6	50	972.9	972.7	79
7001	2023-07-27 07:10:00	8.1	5.1	54	972.9	972.7	76
7001	2023-07-27 07:20:00	8.1	4.3	54	972.9	972.7	77
7001	2023-07-27 07:30:00	8.1	3.5	40	973	972.8	77
7001	2023-07-27 07:40:00	8.3	3.7	32	972.9	972.7	77
7001	2023-07-27 07:50:00	8.4	4.6	23	973.1	972.9	77
7001	2023-07-27 08:00:00	8.7	4.1	22	973.1	972.9	74
7001	2023-07-27 08:10:00	9.1	3.6	32	973.1	972.9	72
7001	2023-07-27 08:20:00	9.6	4	29	973.2	973	71
7001	2023-07-27 08:30:00	9.5	4.5	35	973.2	973	73
7001	2023-07-27 08:40:00	9.5	6.2	28	972.9	972.7	75
7001	2023-07-27 08:50:00	9.7	5.9	27	973	972.8	70
7001	2023-07-27 09:00:00	10.2	5.7	40	973	972.8	67
7001	2023-07-27 09:10:00	10.1	6.1	56	972.8	972.6	65
7001	2023-07-27 09:20:00	10.5	5.8	63	973	972.8	64
7001	2023-07-27 09:30:00	10.6	6.3	60	972.9	972.7	63
7001	2023-07-27 09:40:00	10.7	5	65	972.9	972.7	62
7001	2023-07-27 09:50:00	10.8	6.1	55	972.8	972.6	62
7001	2023-07-27 10:00:00	11.4	5.1	57	973	972.8	63
7001	2023-07-27 10:10:00	11.4	6	39	973	972.8	62
7001	2023-07-27 10:20:00	11.6	4.6	39	973.3	973.1	61
7001	2023-07-27 10:30:00	11.3	4.9	56	972.9	972.7	60
7001	2023-07-27 10:40:00	11.7	5	46	973.1	972.9	57
7001	2023-07-27 10:50:00	11.3	5.2	35	973	972.8	61
7001	2023-07-27 11:00:00	11.7	3.9	26	973.2	973	58
7001	2023-07-27 11:10:00	11.3	2.5	30	973.2	973	59
7001	2023-07-27 11:20:00	11.5	2.2	52	973.3	973.1	61
7001	2023-07-27 11:30:00	11.7	6.4	4	973	972.8	61
7001	2023-07-27 11:40:00	10.9	7.1	13	972.8	972.6	65
7001	2023-07-27 11:50:00	11.3	6.6	9	972.9	972.7	65
7001	2023-07-27 12:00:00	11.4	6.6	16	972.9	972.7	63
7001	2023-07-27 12:10:00	11.5	5.7	18	973	972.8	62
7001	2023-07-27 12:20:00	11.9	4.9	32	973	972.8	63
7001	2023-07-27 12:30:00	12.2	6.8	18	972.8	972.6	60
7001	2023-07-27 12:40:00	12	6.1	29	972.9	972.7	61
7001	2023-07-27 12:50:00	11.7	5.7	17	972.8	972.6	62
7001	2023-07-27 13:00:00	11.7	5.9	13	972.9	972.7	62
7001	2023-07-27 13:10:00	11.7	6.3	13	972.8	972.6	63
7001	2023-07-27 13:20:00	12.6	6.7	19	972.8	972.6	60
7001	2023-07-27 13:30:00	11.9	6.5	15	972.6	972.4	63
7001	2023-07-27 13:40:00	12.2	6.9	9	972.8	972.6	62
7001	2023-07-27 13:50:00	11.7	7.5	8	972.7	972.5	62
7001	2023-07-27 14:00:00	12.4	5.9	12	972.9	972.7	61
7001	2023-07-27 14:10:00	12.3	6.1	5	972.7	972.5	62
7001	2023-07-27 14:20:00	13	5.5	8	973	972.8	62
7001	2023-07-27 14:30:00	12.6	6.2	2	973	972.8	61
7001	2023-07-27 14:40:00	12.8	5.8	1	973	972.8	62
7001	2023-07-27 14:50:00	12.2	5.4	5	973	972.8	61
7001	2023-07-27 15:00:00	12.6	4.3	11	973.2	973	60
7001	2023-07-27 15:10:00	12.9	4.4	5	973.1	972.9	59
7001	2023-07-27 15:20:00	12.9	4.9	0	973.1	972.9	60
7001	2023-07-27 15:30:00	12.6	4.9	0	973.2	973	61
7001	2023-07-27 15:40:00	12.5	3.8	0	973	972.8	61
7001	2023-07-27 15:50:00	12.8	3.9	0	973.2	973	62
7001	2023-07-27 16:00:00	12.9	3.3	0	973.2	973	59
7001	2023-07-27 16:10:00	13	2.7	0	973.4	973.2	60
7001	2023-07-27 16:20:00	13.2	3.9	257	973.3	973.1	58
7001	2023-07-27 16:30:00	13.3	5.7	232	972.9	972.7	62
7001	2023-07-27 16:40:00	13.5	6.6	236	972.8	972.6	61
7001	2023-07-27 16:50:00	13.1	7.7	228	972.9	972.7	63
7001	2023-07-27 17:00:00	12.7	8	220	972.7	972.5	66
7001	2023-07-27 17:10:00	13	8.2	219	973	972.8	66
7001	2023-07-27 17:20:00	13	8.2	214	972.8	972.6	65
7001	2023-07-27 17:30:00	12.8	7.9	217	972.7	972.5	65
7001	2023-07-27 17:40:00	12	9.1	211	972.9	972.7	68
7001	2023-07-27 17:50:00	11.5	9.3	204	972.8	972.6	69
7001	2023-07-27 18:00:00	12.2	9.1	203	972.8	972.6	68
7001	2023-07-27 18:10:00	11.3	8.8	203	972.8	972.6	70
7001	2023-07-27 18:20:00	11.9	8.2	206	973.2	973	71
7001	2023-07-27 18:30:00	11.6	8.6	208	972.9	972.7	71
7001	2023-07-27 18:40:00	11.8	8.7	209	973	972.8	70
7001	2023-07-27 18:50:00	11.2	8.8	214	972.9	972.7	73
7001	2023-07-27 19:00:00	11.3	8.7	212	972.9	972.7	72
7001	2023-07-27 19:10:00	11	8.5	224	973	972.8	74
7001	2023-07-27 19:20:00	11.4	8.3	224	973.2	973	73
7001	2023-07-27 19:30:00	10.9	8.7	222	973	972.8	74
7001	2023-07-27 19:40:00	10.7	8.2	223	973.3	973.1	75
7001	2023-07-27 19:50:00	10.5	7.6	217	973.5	973.3	77
7001	2023-07-27 20:00:00	10.4	8	217	973.5	973.3	76
7001	2023-07-27 20:10:00	10.5	6.8	216	973.6	973.4	76
7001	2023-07-27 20:20:00	10.6	6.1	217	973.7	973.5	77
7001	2023-07-27 20:30:00	10.5	7.1	221	973.7	973.5	77
7001	2023-07-27 20:40:00	10.6	6.2	207	973.3	973.1	76
7001	2023-07-27 20:50:00	10.2	6.3	202	973.7	973.5	77
7001	2023-07-27 21:00:00	10	6.5	202	973.4	973.2	78
[truncated: 1,313 more rows]
