# Supplementary material for: Water Vapor Detection in Volcanic Plumes: Near-Infrared Cameras applications at Lascar, Chile, and Litli Hrútur, Iceland
Source: Copernicus journal article supplement (doi:10.5194/egusphere-2025-6430), 2026-01-29
Supplement: Supplementary file 2 [file Tables_Rojas_Vilches_et_al_Water_Vapor_Detection_in_Volcanic_Plumes_Near-Infrared_Cameras_applications_at_Lascar,_Chile,_and_Litli_Hrútur,_Iceland.xlsx]

## Sheet: Table 1
Volcano	Date	Max Temperature	Max H₂O	H₂O/SO₂		H₂O/CO₂		CO₂/SO₂								H₂O/SO₂	H₂O/SO₂	H₂O/CO₂	H₂O/CO₂	H₂S/SO₂	H₂S/SO₂	CO₂/SO₂	CO₂/SO₂
	[mm/dd/yyyy]	[°C]	[ppm]		±		±		±							-		19.1	6.7	-		-
Lascar	13-10-2022+	18.5	7264	-	-	19.1	6.7	-	-	SMG						-		1150.8	654.1	-		-
	13-10-2022+	11	7264	-	-	1150.8	654.1	-	-	SMG						253.8	186.5	-		-		-
	12-11-2022+	27	19816	253.8	186.5	-	-	-	-	SMG						-		-		-		-
	2022-11-26	18	10600	-	-	-	-	-	-	SMG						86.5	26.8	-		0.13	0.6	0.13	0.6			0.418317
	2022-11-26	15.5	13000	86.5	26.8					SMG																#DIV/0!
	2024-12-29	38.5	21551	-	-	-	-	-	-	SMG						-		41.3	23.9	-		-
Litli Hrutur	2023-07-21	37	21700	-	-	41.3	23.9	-	-	SMG						-		17	17.1	-		-
	2023-07-24	60.6	49503	-	-	17	17.1	-	-	DMG						-				-		-
	2023-07-25	25	-	-	-	-	-	-	-	DMG						88.2	108.8	8.8	23.6	-		5.4	2.7
	2023-07-27	26	18503	72.2	62.1	5.9	5.56	5.4	2.7	DMG						-		199.6	115.1	-		-
	2023-07-28	62	30200	-	-	199.6	115.1	-	-	DMG						137.2	94.3	13.7	19.2	-		6.3	2.85
	2023-08-02	66	34892	137.2	94.3	11.7	11	6.3	2.85	DMG						168.7	43.2	9.89	9.3	-		5.1	2.71
	2023-08-02	71	35155	168.7	43.2	9.89	9.3	5.1	2.71	DMG						124.5	130.3	3.7	8.4	-		29.6	69
	2023-08-02	53	21000	124.5	130.3	3.7	8.4	23.3	16.5	DMG						143.15	98.3167	162.654	97.4889	0.13	0.6	9.306	15.572
SMG=Stationary MultiGAS																131.367	82.1	48.3817	34.7	#DIV/0!	#DIV/0!	5.6	2.75333
DMG=Drone multi-GAS				152.95	68.75
Tassi et al (2009) CO₂/SO₂ =19.0 ± 6.71				126.033	66.5333	11.1225	10.74	5.6	2.75333							152.95	68.75	11.795	14.25			5.6	2.75333
					0.449493		10.15	5.7	2.78

## Sheet: Table 2
Volcano	Day	Latitude	Longitude	Altitude	Distance from crater [km]	Frequency of picture [s]	Total Images/ filter	Calculated Plume speed (anemometer)*	Average H₂O flux		Ppm conversion	Multi-GAS ratios		Calculated SO₂ flux		Calculated CO₂ flux			Plume Cross Corr							Anemometer
	mm/dd/yyyy			[m a.s.l.]				[m/s]	[t/d]	± [t/d]		H₂O/SO₂	H₂O/CO₂	[t/d]	± (SD)	[t/d]	± (SD)				mean	uncertainty	±					mean	uncertainty
Lascar	2022-11-26	-23.3667	67°43'53	5478	0	1	1530	-	-	-	13000	86.5	19.1	-	-	-	-
	2022-11-27	-23.3272	67°47'54	3895	7.94	1	571	7.90-20.3	34787.2	15282.6	13000	86.5	19.1	1430.18	1071.41	4449.34	3515.44		7.9	20.28	14.09	6.19	0.439319
	2022-11-27	-23.3272	67°47'54	3895	7.94	1	392	-	-	-	13000	86.5	19.1	-	-	-	-
	2022-11-28	-23.3142	67°53'29	3240	17.21	3	80	-	-	-	13000	86.5	19.1	-	-	-	-
	2022-11-28	-23.3142	67°53'29	3240	17.21	3	130	-	-	-	13000	86.5	19.1	-	-	-	-
	2022-11-30	-23.3127	67°46'1	4160	6.2	4	328	4.76-13.8	12143	5914.48	13000	86.5	19.1	499.225	397.83	1553.11	1301.28		4.76	13.8	9.28	4.52	0.487069
	2022-11-30	-23.3127	67°46'1	4160	6.2	4	176	4.19-12.1	22415.2	10884.2	13000	86.5	19.1	921.537	732.991	2866.94	2397.8		4.19	12.1	8.145	3.955	0.485574
	2025-12-29	-23.4025	67°43'1"	4160	4.3	1	2760	3.15-7.39 (5-10)	46890.8	18863.1	21155	86.5	19.1	1927.78	1372.78	5997.43	4516.44		3.15	7.39	5.27	2.12	0.402277			5	10	7.5	2.5	0.333333
	2025-12-29	-23.4025	67°43'1"	4160	4.3	1	3302	3.00-17.2 (6-14)	112968	79479.5	21155	86.5	19.1	4644.36	4706.52	14448.8	15234		3	17.24	10.12	7.12	0.703557			6	14	10	4	0.4
Litlti Hrutur	2023-07-19	63.9182	-22.2126	220	0.45	4	2413	13.67-14.75	20291.2	771.093	13600	72.2	17	999.439	897.609	2915.87	3043.83		13.67	14.75	14.21	0.54	0.0380014
	2023-07-21	63.9182	-22.2126	220	0.45	2	2228	27.1	-	-	13600	72.2	17	-	-	-	-		27
								(7-9.1)*				72.2	17	-	-	-	-									7	9.1	8.05	1.05	0.130435
	2023-07-22	63.9182	-22.2126	220	0.45	2	458	.- (5)	-	-	6000	72.2	17	-	-	-	-
	2023-07-24	63.9182	-22.2126	220	0.45	4	2768	1.36-5.28-	20093.6	11862.5	49503	72.2	17	989.709	1435.55	2887.48	4609.13		1.36	5.28	3.32	1.96	0.590361			3.3	4.23	3.765	0.465	0.123506
								(3.3-4.23)*
	2023-07-25	63.9182	-22.2126	220	0.45	4	2485	.-(3)*	2064.79		-	72.2	5.9	3.5562	3.05873	854.937	805.67
	2023-07-27	63.9182	-22.2126	220	0.45	4	1926	3	2919.2	634.609	18503	72.2	5.9	143.785	154.929	1208.71	1401.82		3							2.7	4.2	3.45	0.75	0.217391
								(2.7-4.2)*
	2023-07-28	63.9182	-22.2126	220	0.45	4	323	.-	6185.27	883.61	30200	152.95	10.795	143.812	85.1872	1399.74	560.432									4.2	5.6	4.9	0.7	0.142857
								(4.2-5.6)*
	2023-08-02	63.9183	-22.2129	220	0.45	4	1496	1.10-3.90	29862.8	16723.2	25350	152.95	10.795	694.333	700.925	6758.01	5524.85		1.1	3.9	2.5	1.4	0.56			1.8	2.7	2.25	0.45	0.2
								(1.8-2.7)
Lascar	t/d average								29059	12736.1				1194.68	893.753	3716.71	2932.74				9.381	4.781	0.503559
	tg/yr								10.6066	4.64868				0.436058	0.32622	1.3566	1.07045
Litli Hrútur	t/d average								19108.2	7560.1				706.823	779.817	3490.27	3434.56				6.67667	1.3	0.396121
	tg/eruption								0.439489	0.173882				0.0162569	0.0179358	0.0802763	0.0789949
	kt eruption								439.489	173.882				16.2569	17.9358	80.2763	78.9949
*	calculated with anemometer

## Sheet: Table 3
Volcano	Date	SO₂ concen-tration	plume width	Field wind speed	field wind direction	average SO₂ flux		Multi-GAS		Calc. H₂O flux		Calc. CO₂ flux		type
	[dd-mm-yyyy]	[ppm*m]	[m]	[m/s]		[t/d]	± [t/d]	H₂O/SO₂	CO₂/SO₂	[t/d]	± [t/d]	[t/d]	± [t/d]
Lascar	2022-01-10	nd	nd	nd	nd	764	47	86.5	19	18583.3	6900.81	9971.73	4129.79	Scan
														DOAS
	2022-01-11	nd	nd	nd	nd	424	46	86.5	19	10313.2	4314.21	5534.05	2551.87	Scan
														DOAS
	2022-01-12	nd	nd	nd	nd	285	46	86.5	19	6932.25	3266.69	3719.82	1912.12	Scan
														DOAS
	2023-01-01	nd	nd	nd	nd	483	74	86.5	19	11748.3	5439.9	6304.12	3188.88	Scan
														DOAS
	2024-12-25	nd	nd	nd	nd	293	63	86.5	19	7126.84	3740.48	3824.24	2170.82	Scan
														DOAS
Litli Hrútur	2023-07-14	1475	831	17	10	6506	1922	72.2	5.4	132088	152632	24134.1	19196.8	Car Traverse
	2023-07-21	3000	67	7	330	459	121	72.2	5.4	9318.87	10471.9	1702.67	1300.19	Walking traverse
	2023-07-22	1200	363	3.9	275	441	223	72.2	5.4	8953.42	12228.4	1635.9	1645.17	Walking traverse
	2023-07-24	3000	172	4.3	30	352	94	72.2	5.4	7146.5	8055.22	1305.75	1001.57	Walking traverse
	2023-07-25	2850	149	5.2	310	692	70	72.2	5.4	14049.4	13505.2	2566.99	1543.16	Walking traverse
	2023-07-28	350	1209	6.7	30	516	567	72.2	5.4	10476.1	20522.2	1914.11	3060.35	Car traverse
	2023-08-01	250	350	3	350	466	114	153	5.7	20048.9	13913.6	1824.67	1336.31	Car Traverse
	2023-08-02	275	767	2.7	30	395	224	153	5.7	16994.2	17273.5	1546.66	1631.43	Car Traverse
Lascar	Total					2249	276			18875.2	9180.38	10128.4	5359.7
	Average					449.8	55.2			10940.8	4732.42	5870.79	2790.7
	tg/yr					0.164177	0.020148			3.99339	1.72733	1.39585	0.792351
Litli Hrútur	Total					8959	2674			201453	220025	33411	26653
	Average					1493.17	445.667			33575.5	36670.8	5568.5	4442.17
	tg/eruption					0.0343428	0.0102503			0.772237	0.843428	0.128076	0.10217

## Sheet: Table 4
Volcano	Date	latitude	longitude	altitude	distance from crater	plume speed	SO₂ flux		Multi-GAS		Calculated H₂O flux		Calculated CO₂ flux
	[mm/dd/yyyy]			[m a.s.l.]	[km]	[m/s]	[t/d]	± [t/d]	H₂O/SO₂	CO₂/SO₂	[t/d]	± [t/d]	[t/d]	± [t/d]
Lascar	2022-01-27	-23.3083	-67.759	4620	4.2	7.9	337.8	114.91	86.5	19	8216.54	5340.74	4408.97	3702.89
	2022-01-28	-23.3083	-67.759	4244	6.6	8.1	902.96	99.9	86.5	19	21963.3	9234.76	11785.4	4283.03
	2022-05-31	-23.3932	-67.7244	4709	2.9	14.3	104.5	3.95	86.5	19	2541.83	883.604	1363.93	345.451
Litli Hrútur	2023-07-28	63.9182	-22.2126	220	0.45	7	46.656	33.309	153	5.4	2007.3	2335.04	173.071	212.5
	2023-08-02	63.9182	-22.2126	220	0.45	6.4	117.504	45.48	153	5.7	5055.42	4228.34	460.099	402.481
Lascar	Total						1345.26	218.76			32721.7	15459.1	17558.3	8331.37
	Average						448.42	72.92			10907.2	5153.03	5852.78	2777.12
	tg/yr						0.163673	0.0266158			3.98114	1.88086	2.13627	1.01365
Litli Hrútur	Total						164.16	78.789			7062.72	6563.38	633.17	614.981
	Average						82.08	39.3945			3531.36	3281.69	316.585	307.49
	tg/eruption						0.00246758	0.00095508			0.106164	0.0887952	0.00966208	0.0084521

## Sheet: Table 5
Reference	Volcano	H₂O (Tg/yr)			SO₂ (Tg/yr)			CO₂ (Tg/yr)			Type of data
Mather et al., (2004)	Lascar	20.1166			0.88			14.1528			Gas Measurement
Henney et al., (2012)	Lascar	1.53525			0.101105			1.31962			Gas Measurement
Menard et al., (2014)	Lascar	2.77121			0.1825			2.38199			Gas Measurement
Tamburello et al., (2014)	Lascar	1.89508			0.20221			0.19491			Gas Measurement
Lopez et al., (2015)	Lascar	2.55442			0.047304			0.617412			Gas Measurement
Kern et al., (2017)*	Lascar	91.3			3.97521			11.4427			Gas Measurement
Gaete et al., (2020)	Lascar	3.23713			0.213183			2.78247			Gas Measurement
Gaete et al., (2020) eruption average	Lascar	29.2			0.89			1.31			Gas Measurement
Bucarey et al., (2020)	Lascar	1.24505			0.0819936			1.07581			Gas Measurement
Wilkes et al., (2023)	Lascar	2.4901			0.163987			2.14036			Gas Measurement
de Moor et al., (2025)	Lascar	1.40519			0.147292			0.14523			Gas Measurement
This study Average	Lascar Average	10.61	3.9931	3.98114	0.436	0.164068	0.163666	1.3567	2.14255	2.13634	Gas Measurement
Reference	Volcano	H₂O (Tg)			SO₂ (Tg)			CO₂ (Tg)			Type of data
Scott et al., (2023)	Fagradalsfjall	2.32549			0.101347			0.352182			Gas Measurement
Halldórsson et al., (2022)	Fagradalsfjall	0.102301			0.0723547			0.0516853			Petrologic calculation
Radu et al., (2023)	Fagradalsfjall	0.348754			0.00427394			0.0129168			Petrologic calculation
Pfeffer et al (2024)	Fagradalsfjall	2.1735			0.0947232			0.329163			Gas Measurement
Pfeffer et al (2024)	Fagradalsfjall	1.41354			0.0616032			0.214071			Petrologic calculation
Fischer et al., (2024)	Fagradalsfjall	0.316761			0.152021			0.069552			Gas Measurement
This study Average	Fagradalsfjall	0.439484	0.772225	0.0812222	0.016261	0.034339	0.0018883	0.08027	0.128087	0.0073	Gas Measurement
Reference	Average type	H₂O (Tg/yr)			SO₂ (Tg/yr)			CO₂ (Tg/yr)			Type of data
Hilton et al., (2002)	Total Andean Arc	242.122			3.02909			11.8296			Gas Measurement
Fischer (2008)	Total Andean Arc	76.2046			3.02909			13.7682			Gas Measurement
Tamburello et al., (2014)	total CVZA	10			0.67			0.685			Gas Measurement
de Moor et al., (2025)	Total CVZA	13.8718			2.36948			0.924189			Gas Measurement
This study Average*	Total CVZA	222.737	83.8551	83.6039	9.15968	3.44542	3.43699	28.4908	44.9935	44.8632	Gas Measurement
Reference	Average type	H₂O (Tg/yr)			SO₂ (Tg/yr)			CO₂ (Tg/yr)			Type of data
Hilton et al., (2002)	Global Arc	1462.84			20.2174			63.813			Gas Measurement
Wallace( 2005)	Global Arc	300			10			100			Petrologic calculation
Fischer (2008)	Global Arc	653.054			20.1726			84.9814			Gas Measurement
Fischer et al., (2019)	Global Arc	30.2657			7.81288			6.42531			Gas Measurement
Kelley and Fischer (2025)	Global Arc	486.413			27.28			52.8108			Petrologic calculation
This study average**	Global Arc	1781.9	670.841	668.831	73.2774	27.5633	27.4959	227.926	359.948	358.906	Gas Measurement
1 NIR measurement
2 DOAS avg measurement
3 SO₂ Camera avg measurement
* Lascar measurement*21 active volcanoes with fumarolic activity from Aguilera et al., (2022)
** Lascar average*168 from Fischer et al., (2019)
